1 ***Spontaneous neural synchrony links intrinsic spinal sensory and motor networks during***  
2 ***unconsciousness.***

3  
4 **Jacob G. McPherson**<sup>a,b,c,d,\*</sup>, Maria F. Bandres<sup>a,e</sup>

5 Washington University School of Medicine, St. Louis, MO

6 <sup>a</sup>Program in Physical Therapy; <sup>b</sup>Department of Anesthesiology; <sup>c</sup>Washington University Pain Center; <sup>d</sup>Program in Neurosciences;

7 <sup>e</sup>Department of Biomedical Engineering; \*to whom correspondence should be addressed: [mcperson.jacob@wustl.edu](mailto:mcperson.jacob@wustl.edu)

8  
9  
10 **Address:** 4444 Forest Park Avenue, Campus Box 8502; St. Louis, MO 63108 USA

11  
12 **Corresponding author:** Jacob G. McPherson; [mcperson.jacob@wustl.edu](mailto:mcperson.jacob@wustl.edu)

13  
14 **Abstract**

15  
16 Purposeful functional connectivity during unconsciousness is a defining feature of supraspinal networks.  
17 However, its generalizability to intrinsic spinal networks remains incompletely understood. Previously, Barry  
18 et al. (2014) used fMRI to reveal bilateral resting state functional connectivity within sensory-dominant and,  
19 separately, motor-dominant regions of the spinal cord. Here, we record spike trains from large populations  
20 of spinal interneurons *in vivo* and demonstrate that spontaneous functional connectivity also links sensory-  
21 and motor-dominant regions during unconsciousness. The spatiotemporal patterns of connectivity could  
22 not be explained by latent afferent activity or by populations of interconnected neurons spiking randomly.  
23 We also document connection latencies compatible with mono- and di-synaptic interactions and putative  
24 excitatory and inhibitory connections. The observed activity is consistent with a network policy in which  
25 salient, experience-dependent patterns of neural transmission introduced during behavior or by  
26 injury/disease are reactivated during unconsciousness. Such a spinal replay mechanism could shape  
27 circuit-level connectivity and ultimately behavior.

28  
29  
30 **Keywords:** spinal cord; neural circuit; neural plasticity; sensorimotor integration

31  
32  
33 **Abbreviations:** dDH: deep dorsal horn; fMRI: functional magnetic resonance imaging; IG: intermediate  
34 gray; sDH: superficial dorsal horn; VH: ventral horn  
35  
36

## 37 **Introduction**

38

39 Synchronous neural activity across functionally and spatially distinct brain structures, i.e., functional  
40 connectivity, is a hallmark of sensorimotor integration, cognition, and behavior during periods of attentive  
41 wakefulness. Recent elucidation of brain networks intrinsically active during unconsciousness and  
42 inattentive wakefulness has led to a substantially more nuanced view of brain function(Demertzi et al.,  
43 2019; Fox et al., 2005; Greicius et al., 2003; Mashour and Hudetz, 2018; Raichle et al., 2001; Steriade et al.,  
44 1993; Wenzel et al., 2019). Unconscious network activity spans multiple spatiotemporal scales and has  
45 known functions ranging from circuit-level synaptic stabilization(Puentes-Mestril and Aton, 2017; Tsodyks  
46 et al., 1999; Wei et al., 2016) to maintenance of ongoing physiological processes(Sanchez-Vives et al.,  
47 2017). Although the finding of purposeful spontaneous network activity during unconsciousness appears to  
48 be robust across different functional regions of the brain, it has yet to be unequivocally confirmed whether  
49 this phenomenon is a conserved feature of complex neural systems that generalizes to the spinal cord.

50 Patterns of resting state functional connectivity in the spinal cord have only been preliminarily  
51 characterized(Barry et al., 2014; Chen et al., 2015; Conrad et al., 2018; Eippert et al., 2016; Kong et al.,  
52 2014; Wu et al., 2019). The most reliable findings to-date have been correlations between spontaneous  
53 BOLD signals in the left and right dorsal horns, and, separately, the left and right ventral horns(Barry et al.,  
54 2014; Eippert et al., 2016; Kong et al., 2014; Wu et al., 2019). Spontaneous connectivity between the  
55 dorsal and ventral horns, between the intermediate gray and the ventral horn, and within the ventral horn  
56 itself have yet to be reliably delineated.

57 Other gaps also exist. For example, it is unknown whether network topologies evinced by spinal BOLD  
58 signals mirror those drawn from spike trains of individual neurons. Indeed, BOLD signals are only indirectly  
59 linked to spiking activity,(Logothetis et al., 2001; Murayama et al., 2010; Vakorin et al., 2007) which is  
60 compounded by the relatively coarse spatiotemporal resolution of fMRI in the spinal cord. It is also not  
61 readily apparent whether structured activity at the single-unit level actually persists in spinal networks  
62 during unconsciousness in the absence of evoked neural transmission. The most relevant evidence, which  
63 suggests that aggregate multi-unit and local field potential activity in the dorsal horn is broadly correlated

64 with dorsal horn BOLD fluctuations, was made during mechanical probing of the dermatome.(Wu et al.,  
65 2019)

66 The potential function(s) of resting state intraspinal connectivity are likewise unknown. An intriguing  
67 possibility is that it plays a role in adaptive or maladaptive neural plasticity through a form of reactivation  
68 and synaptic stabilization during unconsciousness. This hypothesis is drawn from the function of  
69 supraspinal network activity during sleep,(Abel et al., 2013; Puentes-Mestril and Aton, 2017; Wei et al.,  
70 2016) and is supported by the finding of altered patterns of BOLD-based intraspinal functional connectivity  
71 in conditions associated with maladaptive neural plasticity in spinal networks.(Chen et al., 2015; Conrad et  
72 al., 2018) To have a direct role in shaping neural plasticity, however, a necessary substrate would be the  
73 tandem presence of synchronous discharge amongst populations of individual units spanning multiple  
74 spatial and functional regions.

75 Given the critical role played by the spinal cord in sensorimotor integration (broadly) and reflexes  
76 (specifically), we reasoned that spontaneous functional connectivity between neurons in sensory-dominant  
77 and motor-dominant regions of the gray matter would be a precondition for purposeful network activity  
78 during unconsciousness, regardless of its function. And for the reasons noted above, such a finding would  
79 have important implications for both the physiological and pathophysiological states. Several fundamental  
80 questions remain unresolved, however. Here, we address three. First, is neuron-level functional  
81 connectivity evident in regions of the spinal gray matter not traditionally associated with primary afferent  
82 inflow? Second, is spontaneous functional connectivity evident between sensory and motor regions of the  
83 gray matter? And third, does the proportion of spontaneously active neurons exhibiting correlated  
84 discharge, as well as their topology, depart from that which would be expected amongst an interconnected  
85 population of statistically similar neurons firing uncooperatively (i.e., randomly)?

86 We addressed these questions *in vivo* in rats, recording large populations of single units throughout the  
87 dorso-ventral extent of the lumbar enlargement. We find that robust spontaneous neural activity is  
88 prevalent throughout the gray matter during unconsciousness and that neurons in sensory and motor  
89 regions exhibit significant, non-random correlations in their spatiotemporal discharge patterns. We also find  
90 a substantial portion of connection latencies consistent with mono- and di-synaptic interactions, offering  
91 clues to a possible mechanism by which intrinsic network activity could directly shape synaptic plasticity.

92

## 93 **Materials and methods**

94

95 All experiments were approved by the Institutional Animal Care and Usage Committees at Florida

96 International University and Washington University in St. Louis.

97

### 98 Surgical procedures, electrode implantation

99

100 Experiments were performed in adult male Sprague-Dawley rats ( $N = 22$ ; weight), divided across two  
101 cohorts. Thirteen animals received urethane anesthesia (1.2 g/Kg i.p.). The remaining 9 animals received  
102 inhaled isoflurane anesthesia (2-4% in  $O_2$ ). Heart rate, respiration rate, body temperature, and  $SpO_2$  were  
103 monitored continuously during the experiments (Kent Scientific, Inc.) and temperature was regulated via  
104 controlled heating pads.

105 In a terminal, aseptic procedure, a skin incision was made over the dorsal surface of the T1 – S1  
106 vertebrae and the exposed subcutaneous tissue and musculature were retracted. The T13 – L3 vertebrae  
107 were cleaned of musculotendonous attachments using a microcurette and the vertebral laminae were  
108 removed to expose spinal segments L4-6. The rat and surgical field were then transferred to an anti-  
109 vibration air table (Kinetic Systems, Inc.) enclosed in a dedicated Faraday cage.

110 Clamps were secured to the vertebrae rostral and caudal to the laminectomy site, and the rat's  
111 abdomen was elevated such that respiration cycles did not result in upwards or downwards movement of  
112 the chest cavity or spinal cord. Under a surgical microscope (Leica Microsystems, Inc.), the exposed spinal  
113 meninges were incised rostrocaudally and reflected. The spinal cord was then covered in homeothermic  
114 physiological ringer solution.

115 A custom 4-axis motorized micromanipulator with sub-micron resolution (Siskiyou Corp.) was then  
116 coarsely centered over the laminectomy site. A silicon microelectrode array (NeuroNexus, Inc.) custom  
117 electrodeposited with activated platinum-iridium electrode contacts (Platinum Group Coatings, Inc.) was  
118 mated via Omnetics nano connectors to a Ripple Nano2+Stim headstage (Ripple Neuro, Inc). The  
119 microelectrode array contained two shanks, each with 16 individual electrode contacts spaced uniformly at

120 100  $\mu\text{m}$  intervals (**Figure 1a**). Electrode impedance ranged from  $\sim 1\text{-}4\text{K}\Omega$  per contact. The headstage was  
121 then securely fastened to the micromanipulator for implantation. During implantation, the data acquisition  
122 system was configured for online visualization of multi-unit and spiking activity from all 32 electrodes.  
123 Neural waveforms for specific electrode channels were also patched into an audio monitor (A-M Systems,  
124 Inc.) for additional real-time feedback.

125 The electrode implantation site targeted the tibial branch of the sciatic nerve, with particular emphasis  
126 on sensitivity to receptive fields on the glabrous skin of the plantar surface of the ipsilateral hindpaw toes.  
127 The implantation site corresponded closely to the L5 spinal nerve dorsal root entry zone in all animals.  
128 Initial implantation site verification was performed by mechanically probing the L5 dermatome, specifically  
129 on the plantar aspect of the ipsilateral hindpaw, with the bottom-most electrodes of the microelectrode  
130 array being in contact with the dorsal roots at their entry zone. If clearly correlated multi-unit neural activity  
131 was evident, the probe was slowly advanced ventrally in  $25\mu\text{m}$  increments until the deepest row of  
132 electrodes was  $\sim 200\mu\text{m}$  deep to the dorsal surface of the spinal cord. The L5 dermatome was again  
133 probed to verify alignment between neural activity at the implantation site and the dermatome. If correlated  
134 multi-unit activity was again observed, the electrode continued to be advanced ventrally in  $25\mu\text{m}$   
135 increments until the ventral-most row of electrode contacts was  $1,600\text{-}1,800\mu\text{m}$  deep to the dorsal surface  
136 (and correspondingly, the dorsal-most row of electrode contacts, i.e., the most superficial, was  $100\text{-}200\mu\text{m}$   
137 deep to the dorsal surface of the spinal cord).

138 In cases where multi-unit dorsal root activity was *not* clearly correlated with the desired hindpaw  
139 receptive field, but rather was correlated with a different receptive field (e.g., on the hairy skin of the leg),  
140 the electrode was repositioned prior to implantation. In cases where *no* discernable correlation could be  
141 observed between a receptive field and dorsal root activity, yet the electrode was positioned over the L5  
142 dorsal root entry zone, the electrode was advanced in  $25\mu\text{m}$  increments to a depth of  $200\mu\text{m}$  ventrally into  
143 the spinal cord and the receptive field mapping procedures was performed again. If appropriate activity was  
144 observed, the electrode was tracked fully; if not, it was removed and a new track was made.

145 In all cases, electrodes were advanced slowly to the target depth to avoid compression of the spinal  
146 cord and to minimize intraspinal trauma from shear. After every  $\sim 100\text{-}200\mu\text{m}$  of penetration, electrode

147 advancement was paused momentarily. Penetration was resumed when neural activity (evinced by multi-  
148 unit and spiking data from implanted channels) stabilized.

149 Upon completion of surgical procedures and data collection, all animals were humanely euthanized in  
150 accordance with AVMA guidelines via overdose of sodium pentobarbital (i.p. injection of Fatal Plus  
151 solution).

152

### 153 Experimental procedure

154

155 We established resting motor threshold for each animal prior to recording spontaneous neural  
156 transmission. We delivered single pulses of charge-balanced current (cathode leading, 200 $\mu$ s/phase, 0s  
157 inter-phase interval) to electrodes located in the ventral horn, with current intensity increasing in increments  
158 of 5 $\mu$ A until a muscle twitch was detected in the L5 myotome (toe twitch on ipsilateral hindpaw). Current  
159 intensity was then reduced in 1 $\mu$ A steps until the twitch was undetectable. Subsequently, we increased  
160 current intensity again in 1 $\mu$ A increments until a twitch was recovered. The lowest current at which a twitch  
161 was detected, across all electrodes, was considered to be resting motor threshold.

162 We recorded 10-20 trials of spontaneous neural transmission per animal. Each trial lasted for ~2-5  
163 minutes. Raw, broad-band neural activity was sampled continuously from the microelectrode array at  
164 30KHz. Electrical line noise and harmonics were removed via hardware filters prior to digitization. During  
165 data acquisition epochs, data from all 32 electrode channels was streamed in real-time to a 60" flat screen  
166 monitor. These data were high-pass filtered at 750Hz to reveal multi-unit neural activity (e.g., **Fig. 1a**). On  
167 channels in which single unit activity was readily observable, dual-window time-amplitude discriminators  
168 were used to discriminate and visualize real-time single-unit spiking activity. Prior to each trial, the  
169 dermatome was mechanically probed to ensure ongoing consistency between electrode placement and  
170 receptive field location and to assess qualitatively the overall degree of neural excitability. The latter  
171 assessment in particular was used in conjunction with vital and other physiological signs to control depth of  
172 anesthesia and to ensure that neural excitability did not become progressively depressed during the data  
173 acquisition session.

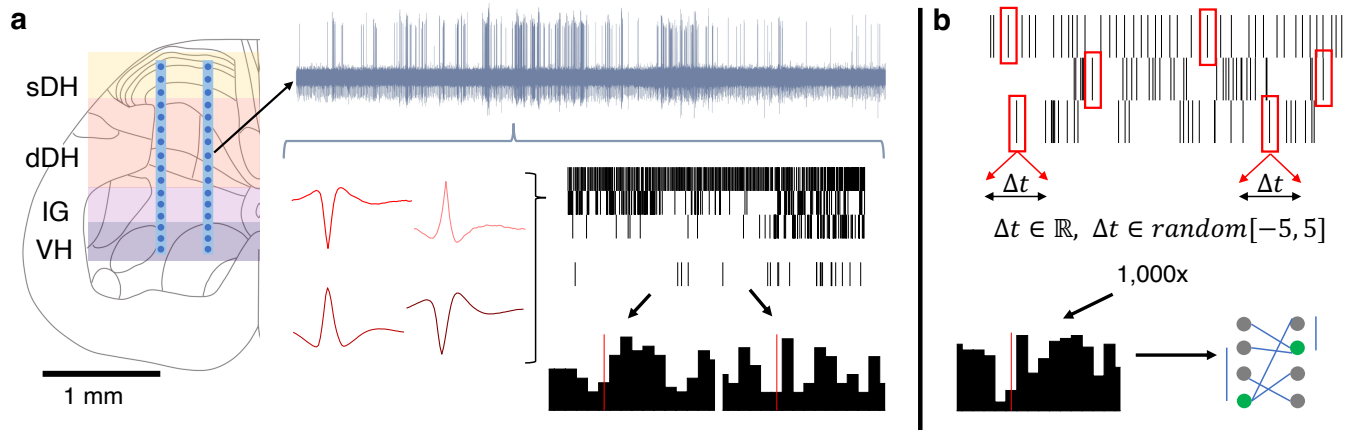

174

175 **Figure 1. Experimental setup, design.** (a) Dual-shank microelectrode arrays with 32 independent recording contacts were implanted into the  
176 spinal cord at the L5 dorsal root entry zone. Electrodes spanned the superficial dorsal horn (sDH), deep dorsal horn (dDH), intermediate gray  
177 matter (IG), and the ventral horn (VH). Multi-unit neural activity was recorded from each electrode (e.g., upper gray trace) and discriminated offline  
178 into spike trains of individual units (red single unit waveforms and spike train raster plots). Temporal synchrony between spontaneously co-active  
179 units was then analyzed via correlation-based approaches (histograms below rasters). (b) Illustration of procedure for generating the synthetic  
180 dataset. Each spike, from every identified neuron in every trial, was randomly shuffled by  $\pm 5$ ms. The shuffled data were then reconstructed,  
181 forming synthetic trials containing neurons with firing properties that were statistically matched to the observed data. This process was then  
182 repeated over 1,000x to generate a large synthetic dataset from which to sample. Spatiotemporal correlation analyses then proceeded on this  
183 synthetic dataset to benchmark the empirically observed data.

184

### 185 Discrimination of units, correlation and functional connectivity analyses

186

187 Single-unit neural activity was discriminated offline using an unsupervised, wavelet-based clustering  
188 approach.(Quiroga et al., 2004) The veracity of discriminated units was verified manually both  
189 quantitatively (e.g., predominance of ISI < 2msec) and visually (e.g., non-physiological shape,  
190 inappropriate duration). Spurious and/or duplicative units were identified and eliminated, with particular  
191 focus on units discriminated on the same or adjacent electrodes (**Fig. 1a**). Functional connectivity analyses  
192 then proceeded as follows on a per-trial basis, where pairs of units found to exhibit statistically significant  
193 temporal synchrony were deemed 'functionally connected.'

194 First, we computed the cross correlation of all unique pairs of admissible units from the 32-channel  
195 microelectrode array, effectively analogous to computing peri-spike time histograms for each pair (**Fig. 1a**).  
196 These computations were performed without regard to the anatomical/spatial location of the units and  
197 without defining each units of a pair as either pre- or post-synaptic. Connection latency was taken to be the  
198 time to peak correlation strength. Connection polarity (excitatory or inhibitory) was inferred using the  
199 normalized cross correlation approach.(Pastore et al., 2018; Shao and Chen, 1987)



200 We then quantified the strength of correlation by adapting an approach originally developed to be  
201 compatible with spike trains containing a relatively small numbers of spikes.(Gerstein and Aertsen, 1985;  
202 Shao and Tsau, 1996) This calculation led to a correlation coefficient analogous to the Pearson correlation  
203 coefficient common in linear regression. If the number of spikes per train is sufficiently low ( $N \leq \sim 50$ ), it is  
204 possible to use this approach to compute p-values via Fisher's exact test.(Shao and Tsau, 1996) However,  
205 our surprisingly vigorous spontaneous neural transmission (see Results), coupled with the length of each  
206 trial, rendered Fisher's exact test largely intractable. As the number of spikes in a train increases, however,  
207 the distribution of spike times approximates the Chi-square distribution, and enables that statistic and  
208 associated degrees of freedom to be used for computation of p-values associated with each correlation  
209 coefficient.

210 Given the large number of neurons discriminated per trial ( $\sim 55$  on average), and thus the large number  
211 of unit-pair combinations in which we computed correlation strength, careful attention was paid to multiple  
212 comparison corrections to minimize the prevalence of falsely concluding that a pair of units was  
213 significantly correlated. Controlling the family-wise error rate by applying Bonferroni correction to each test,  
214 as is often used for post-hoc multiple comparisons corrections in statistical inference, is inappropriate for  
215 datasets such as ours with trials containing extremely large numbers of non-independent  
216 comparisons.(Shao and Tsau, 1996) Therefore, we instead used the Benjamini-Hochberg procedure to  
217 control the false discovery rate of our data on a per-trial basis. This approach ensures that the proportion of  
218 false positive findings amongst all findings deemed to be significant is no more than specified level (in our  
219 case, 5%). The Benjamini-Hochberg procedure is applied at the trial-level, and the specific p-value deemed  
220 to indicate statistical significance is a function of the data from which the statistics are being inferred. Thus,  
221 the significant p-value may be relatively more or less across different trials. Controlling the false discovery  
222 rate is a validated method for multiple comparisons corrections with datasets containing large numbers of  
223 comparisons, and it is particularly effective for situations in which certain elements being compared in a  
224 trial are likely to be more or less correlated than others due to factors such as anatomical connectivity (e.g.,  
225 voxel-wise comparisons of fMRI data, where distance between voxels may influence correlation strength  
226 based on the anatomy/structure-function relationships of the sampled neural structures).(Lindquist and  
227 Mejia, 2015)



228 To characterize topological aspects of functional connectivity, we classified the significantly correlated  
229 unit pairs based on their gross anatomical locations as well as the electrode from which their correlated  
230 units were discriminated. Gross anatomical locations included the superficial dorsal horn (sDH), ranging  
231 from the dorsal surface of the spinal cord to ~400  $\mu\text{m}$  in depth and corresponding approximately to Rexed's  
232 Laminae I-III; the deep dorsal horn (dDH), ranging from ~500-1000 $\mu\text{m}$  and corresponding approximately to  
233 Rexed's Laminae III/IV – VI; the intermediate gray (IG), ranging from ~1100-1300 $\mu\text{m}$ , corresponding to  
234 Rexed's Laminae VII-VIII; and the ventral horn (VH), ranging from ~1400-1600+ $\mu\text{m}$  and including Rexed's  
235 Laminae VIII-IX. We define the 'most connected nodes' for a given trial as the electrodes containing a  
236 significantly greater number of significant unit-pair connections than the mean number of connections  
237 across all electrodes in the microelectrode array.

238

### 239 Synthetic data

240

241 We generated a large synthetic dataset that matched the broad statistical properties of our observed  
242 data to use as an additional means of comparison and analyses (**Fig. 1b**). The details of our approach to  
243 creating this synthetic dataset have been described previously.(Fujisawa et al., 2008) Briefly, however, we  
244 randomly jittered the spike times of each neuron within every observed trial. Specifically, we added  $\pm[0, 1,$   
245  $2, 3, 4, \text{ or } 5]$  msec to each spike time drawn randomly from a uniform distribution on this interval. Using this  
246 synthetic data, we then recomputed the correlation matrices and topological connections described above  
247 as if it was an additional experimental trail. This process was repeated over 1,000X, matching the relative  
248 proportion of synthetic trials per animal to the number of trials actually collected per animal during the  
249 experimental sessions. From this overall synthetic dataset, it was possible to generate confidence intervals  
250 and perform additional statistical comparisons to the observed data.

251

### 252 Statistical methods

253

254 Statistical inference beyond that required for determination of significant temporal connections between  
255 pairs of co-active units (described above) is largely based on analysis of variance (ANOVA) techniques for

256 both the urethane and isoflurane cohorts. The normality of each dataset was confirmed prior to performing  
257 ANOVAs. For within-cohort comparisons, a main effect of anatomical region on the mean number of units,  
258 proportion of significant connections, or proportion of most connected nodes (respectively) was inferred  
259 using 1-way repeated measures ANOVA formulations. Assessment of the potential significance of  
260 anatomical region (within-subjects factor), anesthetic (between-subjects factor) and their interaction on the  
261 proportion of excitatory and inhibitory connections was conducted using a 2-way repeated measures  
262 ANOVA design. If data violated the assumption of sphericity, Greenhouse-Geisser correction was applied.  
263 The family-wise error rate of post-hoc testing was controlled through Bonferroni correction for all  
264 comparisons. Student's t-tests were used to determine differences between individual (non-repeated)  
265 factors. This included comparisons of the proportion of within-region vs. between-region connections for a  
266 given cohort, comparisons of the mean number of units discriminated per animal between the cohorts, and  
267 excitatory vs. inhibitory latencies for a given cohort. For both ANOVA-based and t-test-based analyses,  
268 comparisons were considered significant at the  $\alpha = 0.05$  level. Data are presented in text as mean  $\pm$   
269 standard error unless otherwise noted. All statistical tests were performed in the IBM SPSS environment.

270

271

## 272 **Results**

273

274 *Vigorous spontaneous activity in single units remains evident throughout sensory and motor regions of the*  
275 *spinal gray matter during unconsciousness.*

276

277 We focus on urethane anesthetized animals because urethane potently suppresses spontaneous  
278 discharge in the dorsal roots (minimizing undue afferent activity) while only modestly impacting resting  
279 membrane potential, GABA-ergic, and excitatory amino acid transmission.(Daló and Hackman, 2013; Hara  
280 and Harris, 2002) Thus, urethane enables characterization of the spinal cord in a state more representative  
281 of physiological activity than many other anesthetic agents.

282 First, we quantified the gross anatomical distribution of spontaneously active units. In total, we recorded  
283 from approximately 860 well-isolated units across 13 urethane-anesthetized rats, averaging  $66 \pm 8$  units

284 per trial (e.g., **Fig. 1a**). A representative raster plot from one trial is shown in **Figure 2a**. Spontaneously  
285 active units can be observed throughout the dorso-ventral extent of the sampled region. Broadly  
286 distributed, robust discharge was a consistent feature of all animals. Across the urethane cohort, the mean  
287 number of spontaneously active units discriminated per gross anatomical region per trial was: sDH:  $11 \pm 3$ ;  
288 dDH:  $25 \pm 3$ ; IG:  $16 \pm 2$ ; VH:  $14 \pm 2$  (**Fig. 2b**). We found a significant main effect of region on connection  
289 number ( $F = 6.368$ ,  $P = 0.001$ ), which was driven by a significantly greater number of units in the dDH than  
290 the sDH or VH. No other regions differed from one another (**Supplementary Table 1**).  
291

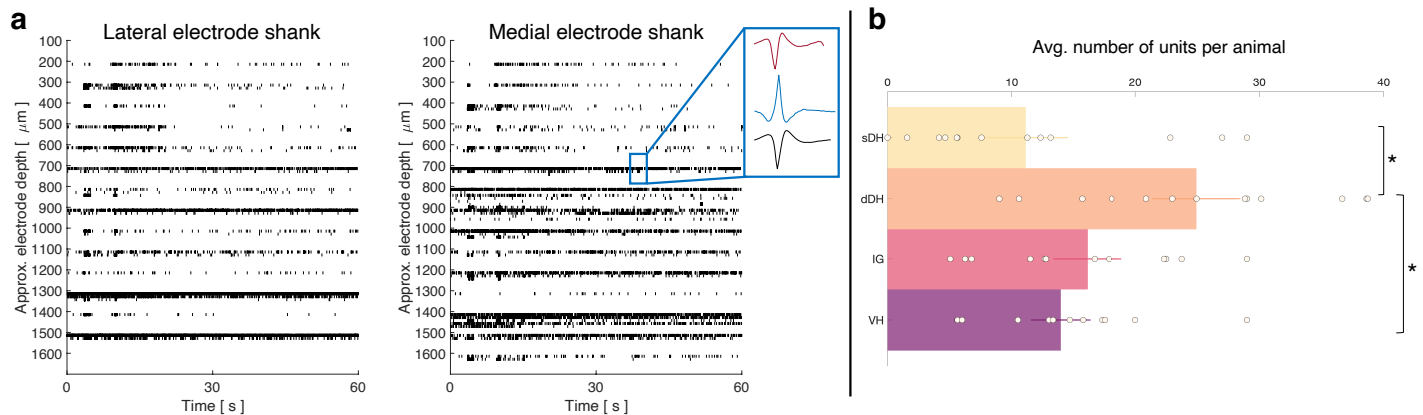

292

293 **Figure 2. Spontaneous neural transmission is broadly evident across all spatial and functional regions of the spinal gray matter.** (a)  
294 Raster plot of spontaneously active neurons. Each row of hatches represents a discrete neuron. Inset depicts representative spike waveforms  
295 discriminated from a single electrode. X-axes (time) are synchronized across the two subplots. (b) Distribution of spontaneously active units per  
296 gross anatomical region across animals in the urethane cohort ( $N=13$  animals). The dDH contained significantly more spontaneously active units on  
297 average than the sDH or VH, driving an overall main effect of region ( $P=0.001$ ).  
298

299 Spontaneous functional connectivity remains evident in intrinsic spinal networks during unconsciousness,  
300 enabling persistent communication between functionally and spatially diverse regions of the spinal gray  
301 matter.

302

303 Next, we asked whether pairs of spontaneously active units exhibited correlated discharge patterns.  
304 Statistical matrices of unit-pair correlations for a representative 5 min epoch can be seen in **Figure R3**. In  
305 **Fig. 3a**, each pixel's color represents the magnitude of correlation between the two units defined by an x-y  
306 pair; connection polarity is not indicated (although see **Figure 4c**). **Fig. 3b** indicates the  $P$ -values of the  
307 correlations. Across all animals and epochs in the urethane cohort,  $4.2 \pm 0.8\%$  of unit pairs exhibited  
308 significantly correlated temporal discharge patterns.

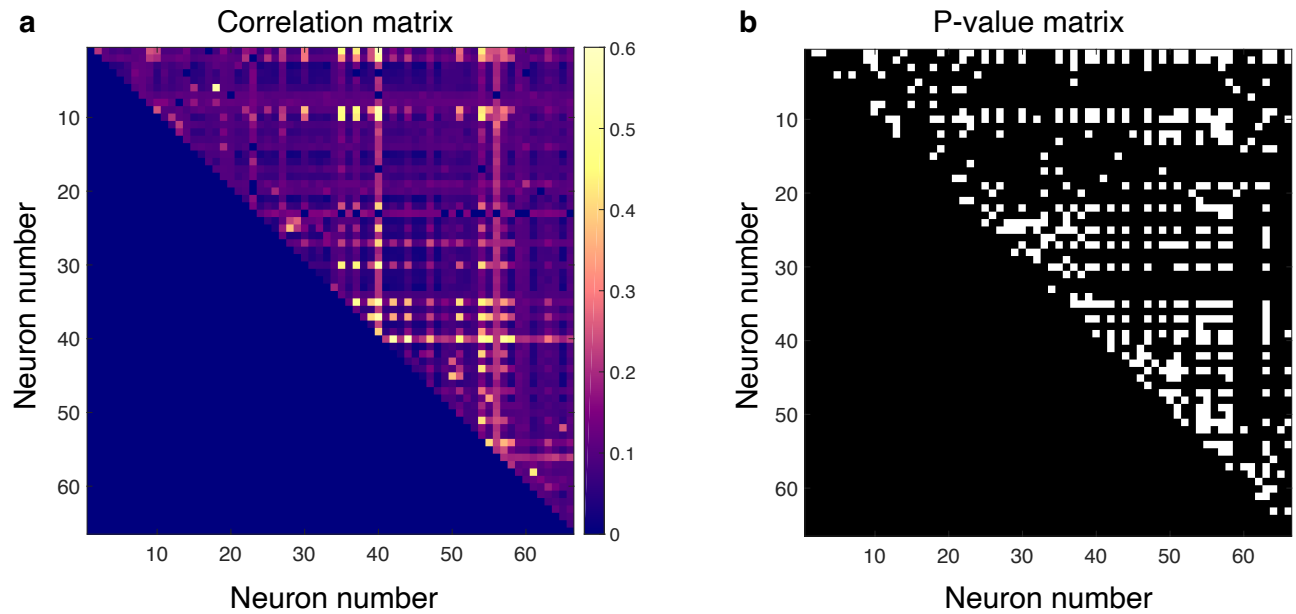

309

310 **Figure 3. Spontaneously active units exhibit temporal synchrony.** For both plots, rows and columns are ordered from 1- $N$ , where  $N$  is the total  
311 number of units discriminated for a given trial. (a) Strength of temporal correlation between pairs co-active units, indicated by pixel color. Pixels  
312 below identity line are omitted because reciprocal connections were not considered. (b) Static matrix of correlation strength show in panel a.  
313 White pixels represent statistically significant correlations, here defined as those with  $P$  values  $\leq 0.02$ . Of the 66 total spontaneously active units  
314 discriminated in this epoch, and thus 2145 possible unique connections (ignoring reciprocal connections), 438 pairs exhibited significantly  
315 correlated temporal discharge.  
316

317 We then sought to determine the gross anatomical organization of synchronous unit pairs. To do so, we  
318 constructed functional connectivity maps that enabled topological aspects of the correlation structure to be  
319 visualized in the context of the microelectrode array geometry and location within the spinal cord. Because  
320 it is not possible to know if the units were synaptically coupled, we adopt the term *functional* connectivity to  
321 refer to significant temporal synchrony between unit pairs.

322 **Figure 4** depict examples of such intraspinal functional connectivity maps from two representative  
323 animals. **Figure 4a, b** depict *all* significant connections, regardless of polarity; **Figure 4c** highlights the  
324 topology of excitatory and inhibitory connections from **Fig. 4a**. In **Figure 4c** (red), we show only the  
325 significant excitatory connections from the animal in **Fig. 4a**; in **Figure 4c** (blue), we show putative inhibitory  
326 connections, also from the animal in **Fig. 4a**. In both figures, gray circles represent each electrode on the  
327 microelectrode array, referred to as ‘nodes.’ Green highlighted circles in **Fig. 4** were determined to be the  
328 most connected nodes of the array (see Methods). Qualitatively, it is evident from **Fig. 4** that pairs of  
329 temporally correlated, spontaneously active units can be found (a) at all sampled dorso-ventral depths, (b)  
330 within each gross anatomical region, and (c) between all anatomical regions.

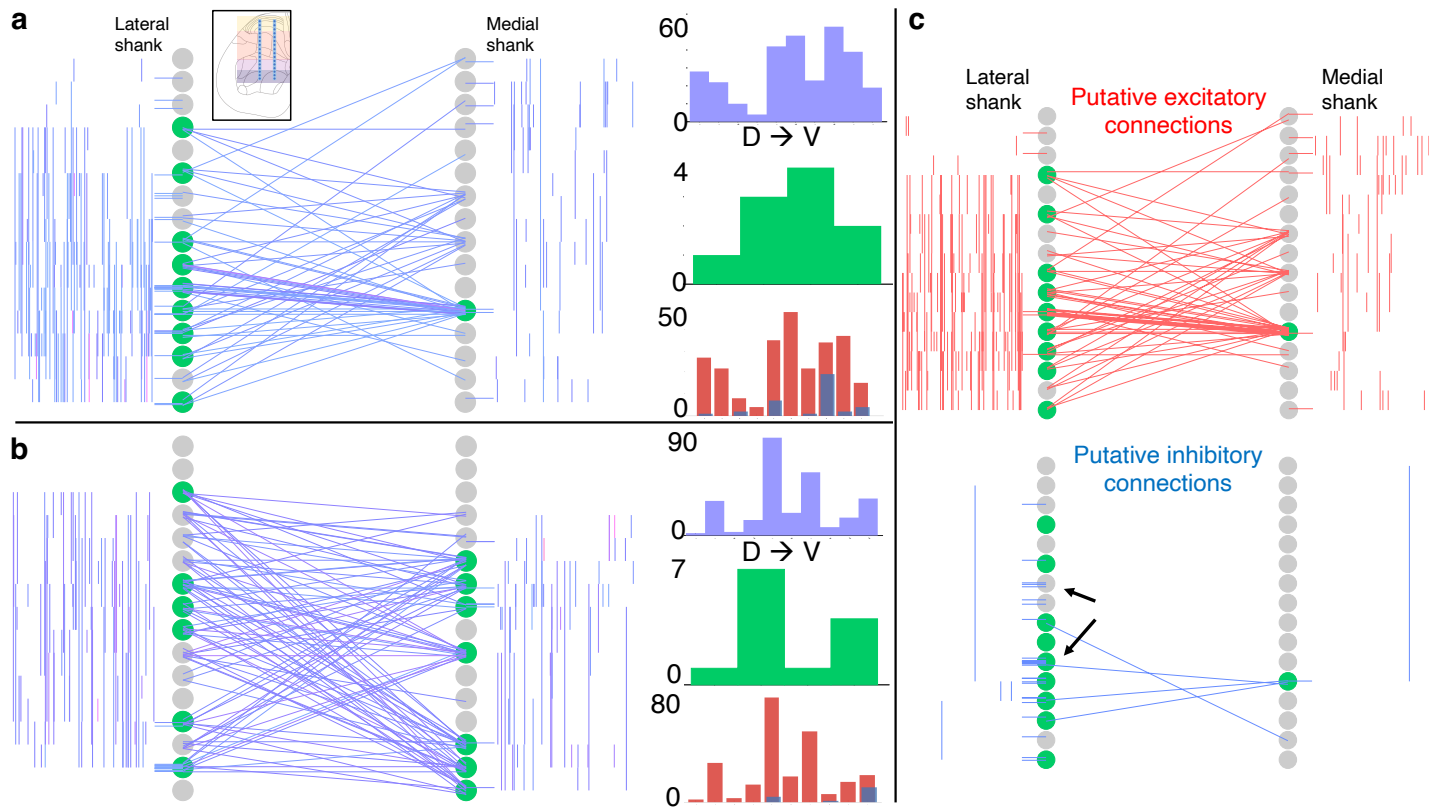

331

332 **Figure 4. Topology of spontaneously synchronous unit pairs is not relegated to regions of primary afferent terminations, rather it links**  
 333 **sensory- and motor-dominant regions of the spinal cord.** Representative functional connectivity maps from two animals (panels a and c from  
 334 same animal; panel c from separate animal). For all topology plots (a, b, c): Spinal cord inset image in panel a shows electrode location. Gray  
 335 circles represent individual electrodes on the microelectrode array. Green highlighted circles were determined to be the most connected nodes of  
 336 the recording. Colored lines represent significantly correlated temporal discharge between pairs of spontaneously active units at the indicated  
 337 locations (note: horizontal lines indicate connections between units discriminated from a single electrode, vertical lines are connections between  
 338 units on the same shank). For panels a, b: line color delineates increasing correlation strength from blue to violet; for panel c: red lines indicate  
 339 putative excitatory connections, blue lines indicate putative inhibitory connections. In panels a, b: histograms depict the following (top to bottom):  
 340 purple histograms indicate the overall anatomical distribution of significant connections (in order left to right: sDH-sDH, sDH-dDH, sDH-IG, sDH-VH,  
 341 dDH-dDH, dDH-IG, dDH-VH, IG-IG, IG-VH, VH-VH; abbreviated as "D→V" for "dorsal to ventral"); green histograms indicate the gross anatomical  
 342 distribution of most connected nodes (in order left to right: sDH, dDH, IG, VH); and red/blue histograms indicate the distribution of putative  
 343 excitatory and inhibitory connections, respectively, in same order as purple histograms above. Black arrows on panel c, inhibitory connections, are  
 344 intended simply to highlight the preponderance of within-electrode connections.  
 345

346

347 Summary functional connectivity data from all animals in the urethane cohort can be seen in **Figure 5**  
 348 and **Fig. 5 – figure supplement 1**. The proportion of significant connections *within* regions, at 68.9%, was  
 349 significantly greater than the proportion of between-region connections, 31.1%. ( $P < 0.0001$ ; **Fig. 5a**). We  
 350 also found a main effect of anatomical region on the proportion of significant connections detected across  
 351 all regions ( $F = 9.277$ ,  $P < 0.0001$ ; **Fig. 5a**, **Fig. 5 – figure supplement 1**; **Supplementary Table 2**). This  
 352 effect was driven (a) by pairs of units *within* the dDH, IG, and VH, which accounted for the highest overall  
 353 proportion of connections ( $24.9 \pm 3.6$ ,  $17.3 \pm 3.7$ , and  $17.4 \pm 3.7\%$ , respectively), and (b) by sDH-IG and sDH-  
 354 VH pairs, which exhibited the lowest proportion of significant connections (1.5 and 1.2%, respectively).  
 355 Predictably, the proportion of significant connections was inversely related to connection distance. For

356 example, sDH-sDH, sDH-dDH, sDH-IG, and sDH-VH connections account for 9.3, 6.3, 1.5, and 1.2% of  
 357 overall significant connections.

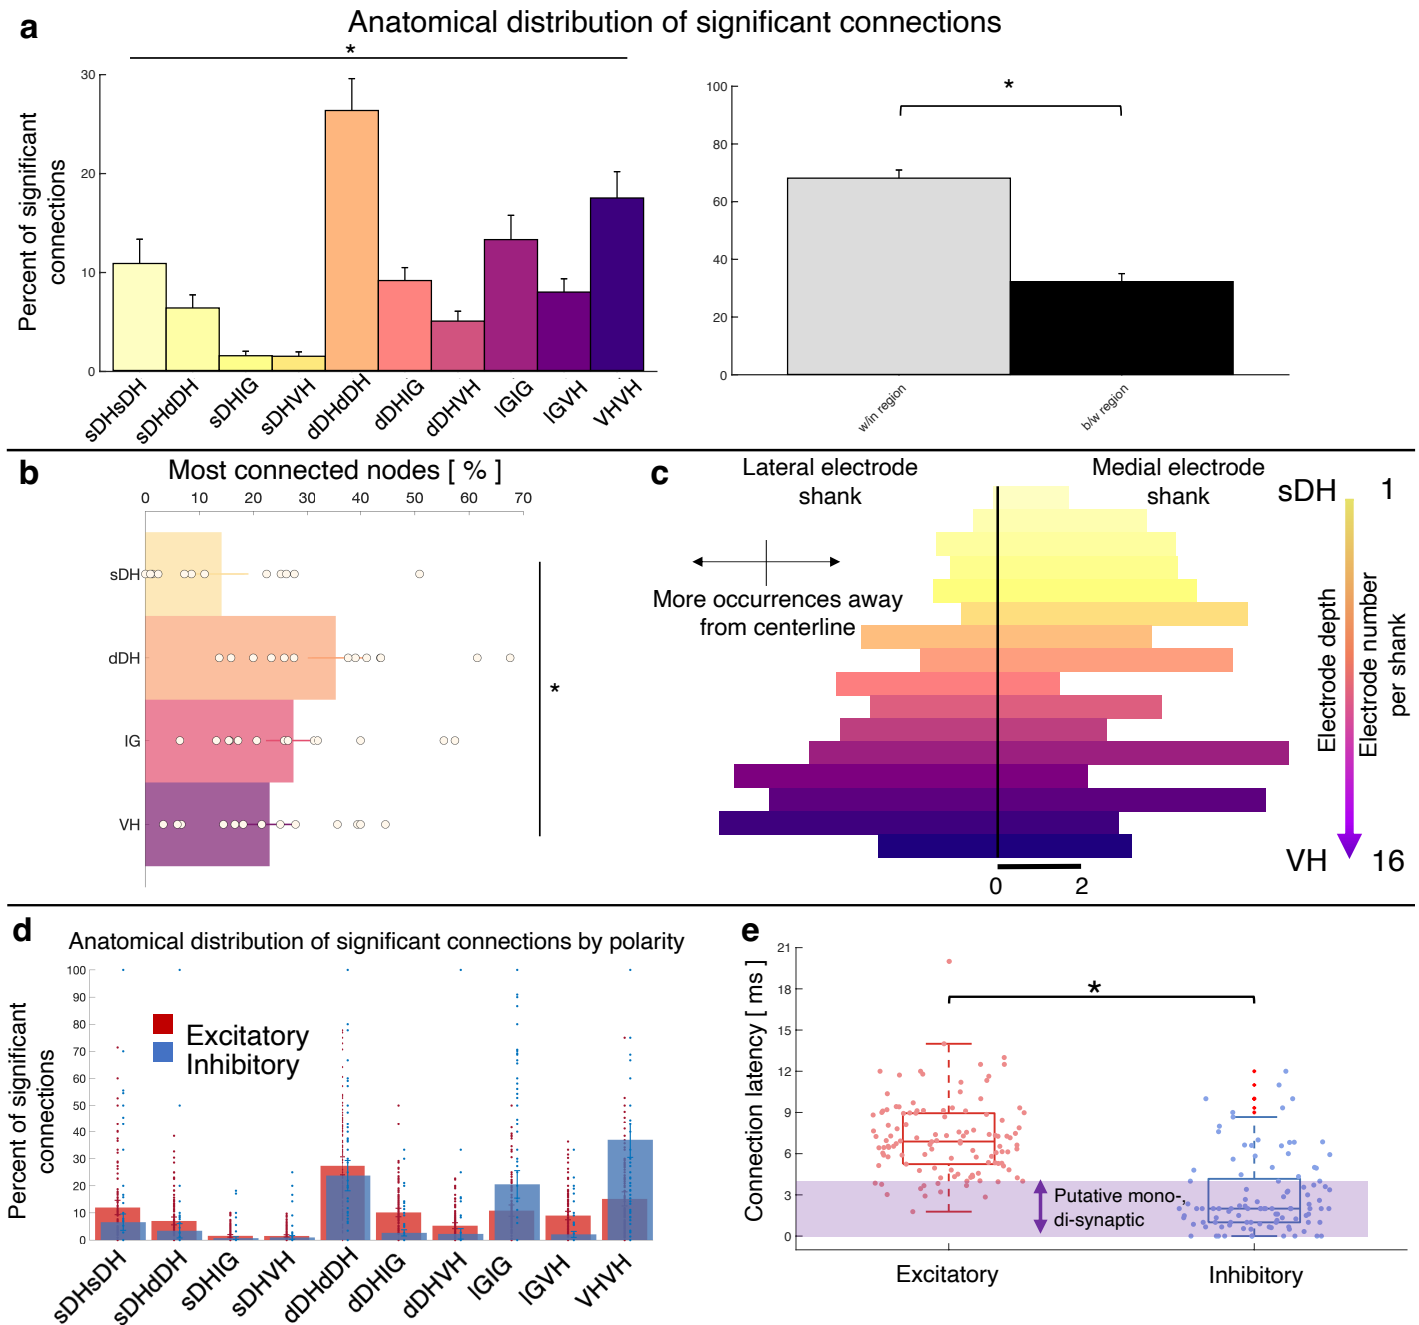

358

359 **Figure 5. Summary topological data for urethane-anesthetized animals.** (a) Proportion of significant connections by anatomical region ( $N = 13$   
 360 animals). From left to right, bar plots indicate connections from sDH-sDH, sDH-dDH, sDH-IG, sDH-VH, dDH-dDH, dDH-IG, dDH-VH, IG-IG, IG-VH,  
 361 VH-VH. Darkening color gradient from left to right qualitatively indicates depth from dorsal surface of spinal cord. Grayscale plots are the proportion  
 362 of within and between-region connections, respectively. Significant connections are not uniformly distributed anatomically, with an overall main  
 363 effect of connection location ( $P < 0.0001$ ) and significantly more within region than between region connections ( $P < 0.0001$ ). (b) Gross anatomical  
 364 distribution of the most connected nodes ( $N = 13$  animals). From top to bottom (light to dark): sDH, dDH, IG, and VH. Significant main effect of  
 365 anatomical region on proportion of most connected nodes,  $P=0.009$ . (c) Histogram of most connected nodes across electrodes on each shank.  
 366 Bars to left of vertical black line reflect lateral electrode shank and bars to right of vertical black line reflect medial electrode shank; from top to  
 367 bottom (light to dark), each row represents one electrode (16 total rows). Bar length indicates number of occurrences that electrode was  
 368 determined to be in the 'most connected' subset. (d) Spatial distribution: proportion of significant connections by polarity (excitatory, inhibitory) and  
 369 anatomical region. Red bars: putative excitatory connections; blue bars: putative inhibitory connections. Purple shaded region intended to highlight latencies compatible with potential  
 370 monosynaptic or disynaptic connections. Inhibitory latencies were significantly shorter than excitatory latencies on average ( $P=0.0003$ ).  
 371

372

373 The gross anatomical connectivity results were also reflected in the distribution of the most connected  
374 nodes. Nodes in the dDH were classified as belonging to the most connected group in a greater proportion  
375 of trials ( $35.4 \pm 4.6\%$ ) than nodes in the sDH ( $14.1 \pm 4.3\%$ ), IG ( $27.4 \pm 4.4\%$ ) or VH ( $23.0 \pm 3.9\%$ ), driving an  
376 overall main effect of anatomical region on the distribution of most connected nodes ( $F = 4.333$ ,  $P = 0.009$ ;  
377 **Fig. 5b, Supplementary Table 3**). It should be noted, however, that the dDH comprised a relatively larger  
378 dorso-ventral extent than did the other regions, and thus contained a greater number of nodes. This  
379 contributed to the greater proportion of connections attributed to it. To this point, in **Fig. 5c**, we show a  
380 histogram of the most connected nodes across the 32-channel microelectrode array. While a clear increase  
381 in counts is evident moving from dorsal-most to ventral-most, many individual electrodes in the IG or VH  
382 exhibited a higher occurrence of being 'most connected' than those in the dDH (and see Discussion).

383 Finally, we characterized the distribution of putative excitatory and inhibitory connections. In **Fig. 5d**, we  
384 highlight their anatomical distribution. We found that connections within the dDH, within the IG, and within  
385 the VH contained the highest proportion of putative inhibitory connections ( $22.7 \pm 5.3\%$ ,  $24.1 \pm 7.3\%$ ,  
386  $37.8 \pm 9.0\%$ , respectively), with the dDH containing the highest proportion of excitatory connections  
387 ( $25.9 \pm 3.7\%$ ). Interestingly, only the dDH displayed an approximately balanced proportion of excitation and  
388 inhibition – i.e., nearly the same proportion of the overall number of putative excitatory connections as  
389 overall putative inhibitory connections.

390 Although it is striking that the highest percentage of inhibitory connections were all within specific  
391 regions rather than between regions, this may be a practical consequence of the extracellular recording  
392 technique: detection of inhibitory connections via correlation-based approaches is notoriously challenging,  
393 in part because both cells must have a relatively high and stable base firing rate to detect a reduction in  
394 firing. Functional connectivity, which includes many polysynaptic pathways, makes detection more difficult  
395 still. Thus, some of the difference we observed in the within vs. between-region distribution of inhibitory  
396 connections may reflect these experimental elements and should not be interpreted exclusively as a  
397 physiological feature of spinal network structure. The relative balance of inhibitory connections may also  
398 change with sensorimotor reflex activation, volitional movement, nociceptive transmission, etc., even using  
399 extracellular recording techniques.



400 The distribution of latencies between each statistically significant connection is shown in **Fig. 5e**. Mean  
401 excitatory latency was significantly longer than the mean inhibitory latency, at  $6.4 \pm 0.6$  msec vs.  $2.7 \pm 0.4$   
402 msec ( $P = 0.0003$ ), with both categories including latencies consistent with putative mono-, di-, and poly-  
403 synaptic pathways. Interestingly, we find a subset of both excitatory and inhibitory connections with  
404 latencies between 0-1msec. While some of these connections could indeed be monosynaptic and the lower  
405 than expected delay merely related to binning spikes, the most likely interpretation for coincidentally firing  
406 unit pairs would be a shared presynaptic input. While the distribution of inhibitory latencies contained was  
407 skewed towards an increased probability of observing putative mono- and di-synaptic connections, this  
408 apparent disparity may also be related to the aforementioned challenging of detecting inhibition via  
409 extracellular recording techniques.

410

411 Functional connectivity within and between deep regions of the spinal gray matter is not abolished by  
412 preferential pharmacological depression.

413

414 The finding of robust functional connectivity between sensory-dominant dorsal horn regions and the IG  
415 and VH was unexpected. Especially intriguing was the presence of vigorous neural transmission within the  
416 IG and VH themselves. Although urethane profoundly depresses spontaneous discharge in the dorsal root  
417 ganglia, it exerts less of a depressive effect on cells deep in the gray matter (i.e., the IG and VH). (Daló and  
418 Hackman, 2013; Hara and Harris, 2002) To control for the potential influence of this anesthetic gradient on  
419 our findings, we conducted an additional set of experiments in a cohort of 8 rats anesthetized with  
420 isoflurane. Isoflurane is a more potent depressant of spinal motor activity than urethane, with an overall  
421 gradient of depression that increases from the dorsal horn to the ventral horn. (Kim et al., 2007) For  
422 example, while nociceptive pathways in the superficial dorsal horn remain largely uninhibited by isoflurane,  
423 premotor interneurons and motoneurons in the ventral horn are markedly depressed. (Grasshoff and  
424 Antkowiak, 2006) Mean intraspinal resting motor threshold confirmed the greater depression of ventral horn  
425 cells by isoflurane than urethane (isoflurane threshold:  $20.4 \mu\text{A}$ ; urethane threshold  $14.0 \mu\text{A}$ ).

426 In total, we recorded from 484 well-isolated units across the 9 rats, translating to  $\sim 51 \pm 2$  units per trial.  
427 The mean number of units recorded per trial did not differ between the urethane and the isoflurane cohorts

428 ( $P = 0.0718$ ). A representative raster plot of spontaneous neural activity from one trial is shown in **Figure**  
 429 **6a**. Surprisingly, spontaneously active units were observed throughout the dorso-ventral extent of the  
 430 sampled region in all animals, including the IG and VH. The mean numbers of units per region are as  
 431 follows: sDH:  $9 \pm 2$ , dDH:  $20 \pm 3$ , IG:  $12 \pm 1$ , VH:  $13 \pm 1$  (main effect of region:  $F = 6.650$ ,  $P=0.001$ ; **Fig. 6b**,  
 432 **Supplementary Table 4**). In **Fig. 6c**, we show a representative functional connectivity map for the  
 433 isoflurane cohort.

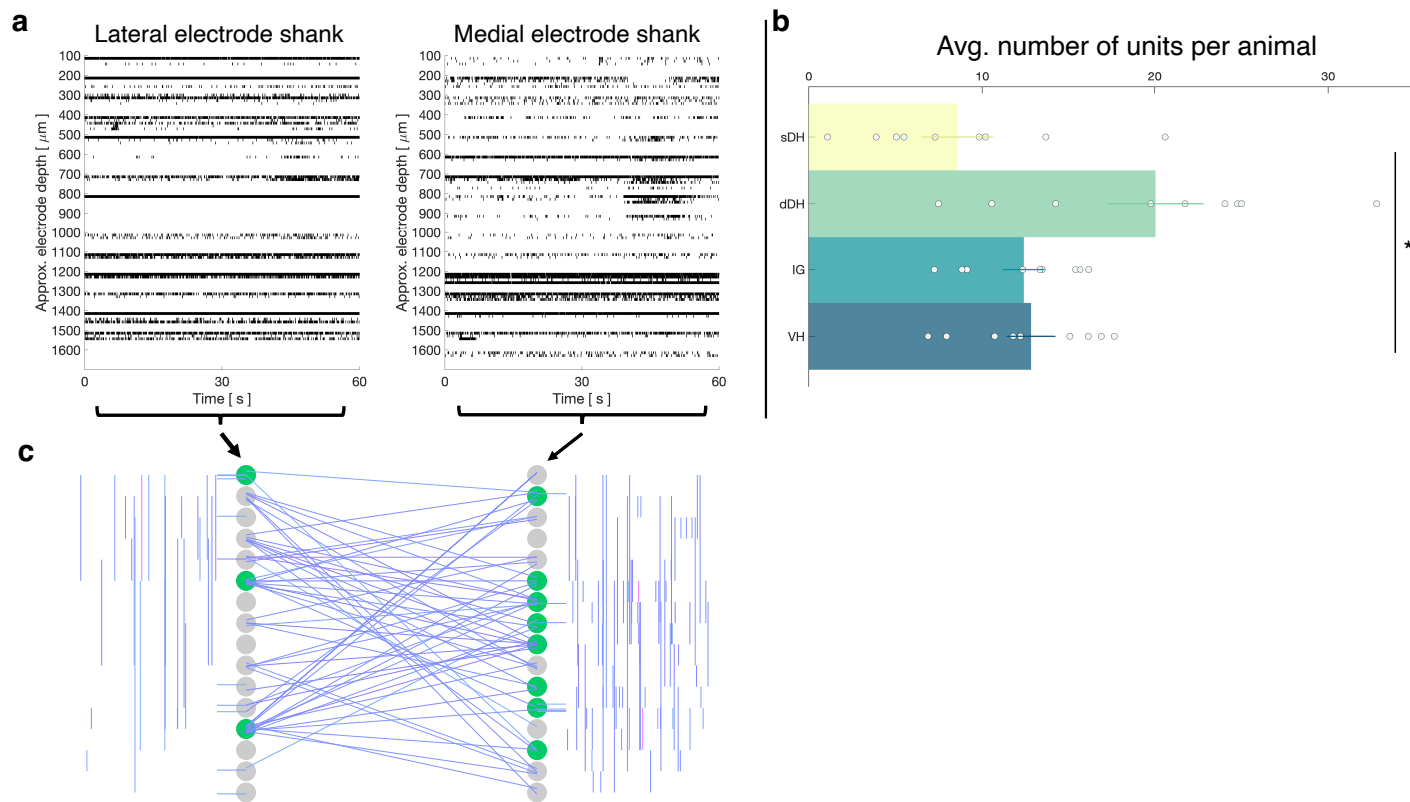

434

435 **Figure 6. Vigorous spontaneous sensorimotor functional connectivity persists despite preferential depression of ventral horn cells.** (a)  
 436 Raster plot of spontaneously active neurons from a representative isoflurane-anesthetized animal. Each row of hatches represents a discrete  
 437 neuron. X-axes (time) are synchronized across the two subplots. (b) Distribution of spontaneously active units per gross anatomical region across  
 438 animals in the isoflurane cohort ( $N=9$  animals). The dDH contained significantly more spontaneously active units on average than the sDH or VH,  
 439 driving an overall main effect of region ( $P=0.001$ ). (c) Representative functional connectivity map from panel a. Gray circles represent individual  
 440 electrodes on the microelectrode array (as in Fig. 4). Green highlighted circles were determined to be the most connected nodes of the recording.  
 441 Colored lines represent significantly correlated temporal discharge between pairs of spontaneously active units at the indicated locations (note:  
 442 horizontal lines indicate connections between units discriminated from a single electrode, vertical lines are connections between units on the same  
 443 shank). Line color delineates increasing correlation strength from blue to violet.  
 444

445 Summary data from the isoflurane cohort can be seen in **Figure 7** and **Fig. 7 – figure supplement 1**.

446 In **Fig. 7a** and **Fig. 7 – figure supplement 1**, we show the gross anatomical distribution of significant  
 447 connections. Similar to the urethane cohort, we observed a significantly greater proportion of connections  
 448 *within* regions (66.4%) than across regions (33.6%) ( $P = 0.005$ ), and an overall main effect of anatomical  
 449 region (e.g., sDH-sDH, sDH-dDH, etc.) on the proportion of significant connections ( $F = 6.517$ ,  $P<0.0001$ ;

450 **Supplementary Table 5**). Interestingly, despite the different mechanisms of action and depressive profiles  
451 of the two anesthetics, we found no systematic difference in the proportion of significant connections per  
452 region across the urethane and isoflurane cohorts (anesthetic by region interaction:  $F=0.369$ ,  $P=0.949$ ;  
453 main effect of anesthetic:  $F=0.631$ ,  $P=0.436$ ); rather, all were within 1.8% of one another on average  
454 (range, 4-6%, **Fig. 7b**). The distribution of most connected nodes in the isoflurane cohort also mirrored that  
455 of the urethane cohort. Specifically, the largest proportion of most connected nodes was found in the dDH  
456 (34.2%), the lowest in the sDH (13.2%), with 22.6% in the IG and 30.0% in the VH. There was a significant  
457 main effect of region on most connected node ( $F = 4.935$ ,  $P = 0.006$ ; **Supplementary Table 6, Fig 7c, d**).  
458 Together, these findings provide additional confirmation of the presence of persistent, synchronous  
459 discharge between functionally and spatially different regions of the spinal gray matter during  
460 unconsciousness. That such activity persisted in the IG and VH with isoflurane also underscores the  
461 apparent robustness of the finding.

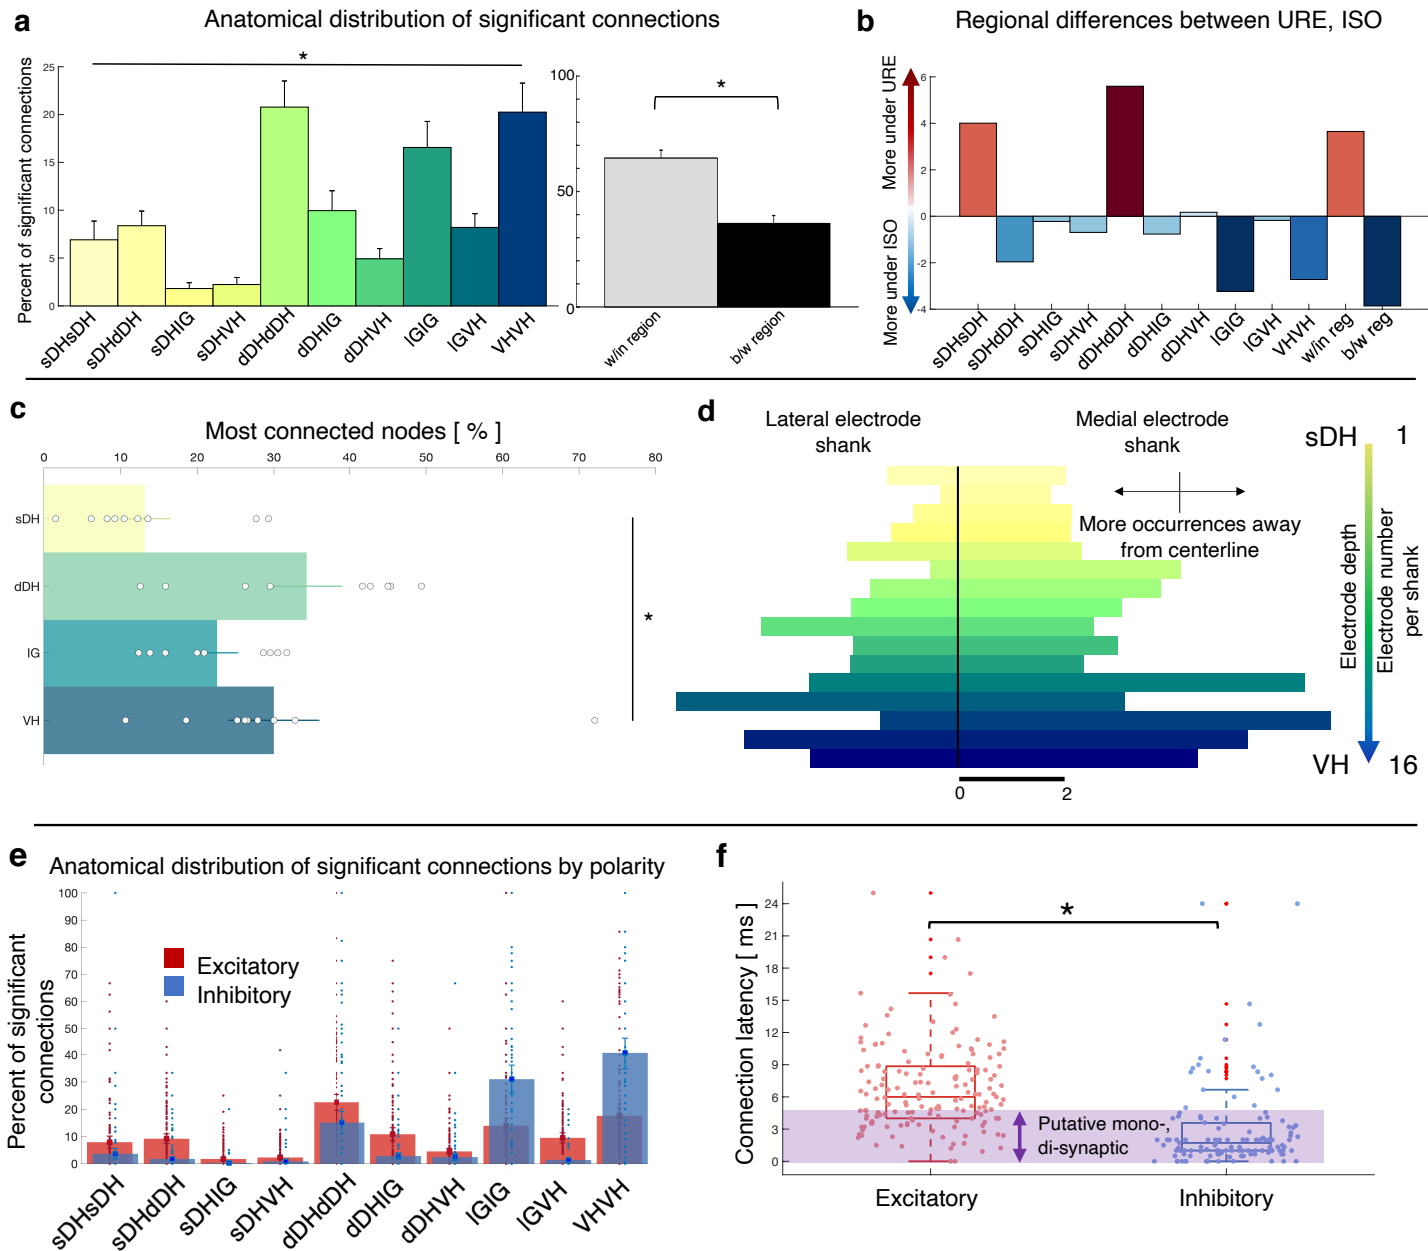

462

463

464

465

466

467

468

469

470

471

472

473

474

475

476

477

478

479

480

481

482

**Figure 7. Summary topological data for isoflurane-anesthetized animals.** (a) Proportion of significant connections by anatomical region ( $N = 9$  animals). From left to right, bar plots indicate connections from sDH-sDH, sDH-dDH, sDH-IG, sDH-VH, dDH-dDH, dDH-IG, dDH-VH, IG-IG, IG-VH, VH-VH. Darkening color gradient from left to right qualitatively indicates depth from dorsal surface of spinal cord. Grayscale plots are the proportion of within and between-region connections, respectively. Significant connections are not uniformly distributed anatomically, with an overall main effect of connection location ( $P < 0.0001$ ) and significantly more within region than between region connections ( $P < 0.005$ ). (b) Difference in proportion of significant connections per anatomical region between the urethane (URE) and isoflurane (ISO) cohorts. Vertical axis represents the difference in proportion of connections between the two cohorts; positive values: more significant connections in the urethane cohort; negative values: more significant connections in the isoflurane cohort. Overall, there was no statistically significant difference between the anatomical distribution of significant connections between the two cohorts. (c) Gross anatomical distribution of the most connected nodes ( $N = 9$  animals). From top to bottom (light to dark): sDH, dDH, IG, and VH. Significant main effect of anatomical region on proportion of most connected nodes,  $P=0.006$ . (d) Histogram of most connected nodes across electrodes on each shank. Bars to left of vertical black line reflect lateral electrode shank and bars to right of vertical black line reflect medial electrode shank; from top to bottom (light to dark), each row represents one electrode (16 total rows). Bar length indicates number of occurrences that electrode was determined to be in the 'most connected' subset. (e) Spatial distribution: proportion of significant connections by polarity (excitatory, inhibitory) and anatomical region in the isoflurane cohort. Red bars: putative excitatory connections; blue bars: putative inhibitory connections. (f) Temporal distribution: latencies of significant excitatory (red) and inhibitory (blue) connections in the isoflurane cohort. Purple shaded region intended to highlight latencies compatible with potential monosynaptic or disynaptic connections. Inhibitory latencies were significantly shorter than excitatory latencies on average within the isoflurane cohort ( $P=0.017$ ). We found no systematic differences in the spatiotemporal profiles of excitatory and inhibitory connections between the urethane and isoflurane cohorts, which preferentially depress the dorsal and ventral horns, respectively.

483 The anatomical distribution of excitatory and inhibitory links also remained remarkably stable between  
484 urethane and isoflurane (**Figure 7e**). There was no main effect of anesthetic agent nor an interaction of  
485 drug by region for either the proportion of excitatory or inhibitory links in each region (Excitatory: Region:  
486  $F=13.981$ ,  $P=0.000$ ; region\*drug:  $F=0.348$ ,  $P=0.819$ ; drug:  $F=0.030$ ,  $P=0.865$ , **Supplementary Table 7**;  
487 Inhibitory: Region:  $F=19.403$ ;  $P=0.000$ ; region\*drug:  $F=0.231$ ,  $P=0.794$ ; drug:  $F=0.611$ ,  $P=0.444$ , **Table**  
488 **Supplementary Table 8**). The mean latency of excitatory and inhibitory connections also did not change  
489 from the urethane to the isoflurane cohorts (excitatory:  $6.4\pm 0.5$  vs.  $6.7 \pm 1$  msec,  $P = 0.8188$ ; inhibitory:  
490  $2.6\pm 0.4$  vs.  $3.1\pm 0.6$  msec,  $P = 0.5389$ ). Within the isoflurane cohort, inhibitory latencies were significantly  
491 shorter than excitatory latencies ( $P=0.017$ ; **Fig. 7f**), which was also reflected when pooling data across  
492 both cohorts (i.e., inhibitory latencies were significantly shorter than excitatory latencies on average at  $2.9$   
493 vs.  $6.5$  msec,  $P<0.0001$ ).

494

495 *The magnitude and spatiotemporal profile of unconscious intraspinal functional connectivity are not*  
496 *explained by random network activity.*

497

498 Because these experiments characterize spontaneous rather than evoked network activity, it is  
499 reasonable to question whether the activity is likely to emerge merely by chance. To address this question,  
500 we first asked whether the proportion of significantly correlated unit pairs was greater than that which would  
501 be expected by an interconnected population of statistically-matched neurons firing randomly. Across  
502 animals, we find that the mean proportion of significantly correlated unit pairs in the synthetic dataset was  
503 significantly lower than that observed experimentally (Urethane:  $2.7\% \pm 0.4$  vs  $4.2 \pm 0.8\%$ , respectively,  $P =$   
504  $0.0053$ ; Isoflurane:  $2.7\pm 1.1$  vs.  $3.9\pm 1.3$ ,  $P=0.0033$ ). On a per-animal level, we find that the proportion of  
505 significant connections in the observed data always exceeded its synthetic counterpart; that is, in no  
506 animals did we detect only as few (or fewer) significant connections than would be expected at random  
507 when controlling for the uniqueness of each animal's own data. These findings indicate that the overall  
508 degree of temporal synchrony was highly unlikely to be observed at random.

509 Next, we asked whether the spatial patterns of connectivity – i.e., the topology of the significantly  
510 correlated unit pairs – differed from a random structure. Given the consistent surgical placement of our

511 microelectrode arrays in each experiment, their known geometry, and our definitions of the approximate  
 512 boundaries between gross anatomical regions in the spinal gray matter, it is possible to directly compute  
 513 the probabilities that significant connections will exist within or between regions if neurons are distributed at  
 514 random. These probabilities are: sDH-sDH: 6.3%; sDH-dDH: 15.6%; sDH-IG: 10.9%; sDH-VH: 10.9%;  
 515 dDH-dDH: 9.4%; dDH-IG: 14.1%; dDH-VH: 14.1%; IG-IG: 4.7%; IG-VH: 9.4%, and VH-VH: 4.7%. For within  
 516 and between region connections, the probabilities are 25% and 75%, respectively. We then verified that the  
 517 bootstrapped synthetic data indeed converged to these theoretical predictions (**Figure 8a**).

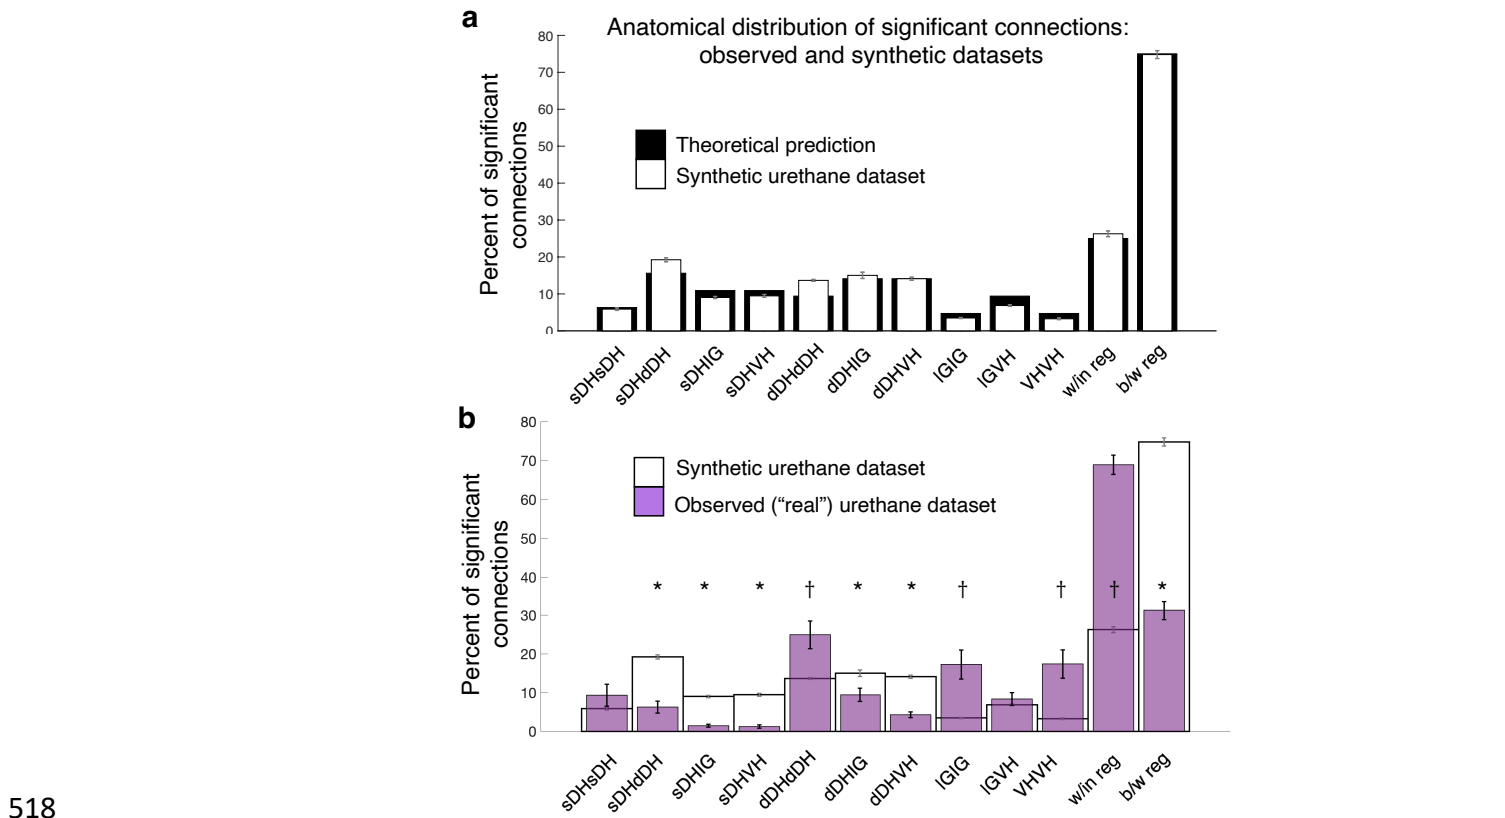

518  
 519 **Figure 8. Experimentally realized spatial patterns of functional connectivity diverge from predictions of random network interactions.** (a)  
 520 Proportion of significant connections by anatomical region. From left to right, bar plots indicate connections from sDH-sDH, sDH-dDH, sDH-IG,  
 521 sDH-VH, dDH-dDH, dDH-IG, dDH-VH, IG-IG, IG-VH, VH-VH. Black bars indicate theoretical predictions; white bars indicate results of simulations  $\pm$   
 522 sem (i.e., synthetic data). The synthetic dataset, generated from randomly shuffling by  $\pm$  0-5ms each spike time of each neuron in each trial, then  
 523 repeating  $>1,000x$ , converges to theoretical predictions. Theoretical predictions are based upon the number and anatomical distribution of  
 524 electrodes throughout the gray matter. (b) Anatomical distribution of synthetic data (white, as in panel a) compared to experimentally realized  
 525 urethane data ( $N=13$ , purple bars). We found a significant interaction of cohort by anatomical region (real vs. synthetic,  $P<0.0001$ ), indicating the  
 526 divergence of the real dataset from that which would be expected by a population of interconnected neurons that are statistically similar but spiking  
 527 at random. Asterisks indicate connections in which the synthetic data was overrepresented relative to the real data; crosses indicate connections in  
 528 which the real data was overrepresented relative to the synthetic data. Most notably, we found significantly more within-region connections in the  
 529 real data compared to the synthetic ( $P<0.0001$ ), and significantly fewer between region connections in the real compared to the synthetic data  
 530 ( $P<0.0001$ ).  
 531

532 We found an overall main effect of anatomical region on connectivity patterns between the  
 533 bootstrapped synthetic data and the observed data (Urethane:  $F=10.571$ ,  $P<0.0001$ , **Figure 8b**,  
 534 **Supplementary Table 9**; Isoflurane:  $F=7.251$ ,  $P=0.001$ , **Supplementary Table 10**) and, notably, a

535 significant interaction of region by cohort (i.e., real or synthetic urethane data;  $F = 16.168$ ;  $P < 0.0001$   
536 **Supplementary Table 9**; isoflurane:  $F = 11.561$ ,  $P < 0.0001$ , **Supplementary Table 10**). Post-hoc testing  
537 across regions revealed a lower proportion of significant sDH-dDH, sDH-IG, sDH-VH, dDH-IG, and dDH-  
538 VH connections in the real compared to the synthetic dataset and a significantly greater proportion of dDH-  
539 dDH, IG-IG, and VH-VH connections in the observed compared to the synthetic dataset (**Figure 8b**).  
540 Overall, we found a significantly greater proportion of within-region connections in the observed dataset  
541 than the synthetic dataset (68.9 vs. 26.3%,  $P < 0.0001$ ) and a significantly lower proportion of between-  
542 region connections in the observed dataset compared to the synthetic dataset (31.1 vs. 73.7%,  $P < 0.0001$ ).

543

## 544 Discussion

545

### 546 Presence of an intrinsic spinal network active during unconsciousness

547

548 Our primary finding is that neural transmission persists in the spinal cord during unconsciousness at a  
549 level and with a structure that appears to be non-random. We interpret our findings as supporting the  
550 emerging view that the spinal cord possesses intrinsic networks that maintain purposeful activity during  
551 unconsciousness and in the absence of evoked neural transmission (Barry et al., 2014; Eippert and Tracey,  
552 2014).

553 In intrinsic *surpraspinal* networks, purposeful neural transmission during unconsciousness involves  
554 patterned activity within local and regional circuits as well as communication between functionally and  
555 spatially distributed neural structures. (Demertzi et al., 2019; Fox et al., 2005; Greicius et al., 2003; Mashour  
556 and Hudetz, 2018; Raichle et al., 2001; Steriade et al., 1993; Wenzel et al., 2019) Thus, we reasoned that  
557 persistence of correlated discharge at multiple spatial scales would also be a necessary precondition for  
558 intrinsic spinal networks to maintain purposeful activity during unconsciousness. Central to this idea would  
559 be the presence of functional connectivity within sensorimotor regions deep in the gray matter (in addition  
560 to connectivity within and between the predominantly sensory regions of the dorsal horn), as the spinal  
561 cord plays a key role in sensorimotor integration and motor output.



562 To this point, we found a greater proportion of connectivity within the VH than within or between any  
563 other region(s) except within the dDH, despite a lack of motor output. Connections within the IG were the  
564 third most represented (behind dDH-dDH and VH-VH). Of particular note is the proportion of VH-VH  
565 connections relative to dDH-dDH connections. While it is perhaps not surprising that the dDH exhibited the  
566 greatest interconnectivity given that it forms both local and distributed circuits and receives direct primary  
567 afferent input, it is however surprising that, when normalized for anatomical area, the dDH exhibits only  
568 ~60% as much within-region connectivity as the VH.

569 Previous studies have found resting state functional connectivity within the dorsal horns and the ventral  
570 horns, respectively, but it has been an enduring question whether functional connectivity exists between  
571 the dorsal horn and other regions of the spinal gray matter during unconsciousness, particularly in the  
572 absence of evoked responses.(Barry et al., 2014; Eippert et al., 2016; Kong et al., 2014; Wu et al., 2019)  
573 Remarkably, we found that >20% of all significant connections were between the sDH or dDH and the IG or  
574 VH (e.g., **Fig. 5a**). To the best of our knowledge, this is the first such demonstration of single-neuron level  
575 spontaneous functional connectivity between sensory and motor regions of the spinal gray matter during  
576 unconsciousness. From these findings, we can conclude that spontaneous synchronous discharge of  
577 spinal neurons during unconsciousness is not confined to local, sensory-dominant circuits in the dorsal  
578 horn; rather, it spans spatially and functionally distinct regions of the spinal gray matter, reflecting the  
579 integrative nature of spinal neural transmission during periods of wakeful behavior.

580 Determining whether the connectivity we see truly reflects the presence of orderly activity in an intrinsic  
581 spinal network during unconsciousness is a complex process, in part because of the potential role of  
582 sensory afferent inflow. On the other hand, the presence of nominal sensory inflow does not itself exclude  
583 the possibility that intrinsic activity was maintained; merely that the observed activity reflects the interaction  
584 of the two. This would be analogous to studies of resting state functional connectivity in the brain during  
585 inattentive wakefulness (e.g., the default mode network), where environmental stimuli and sensory  
586 feedback are continuously present, but lack saliency.(Raichle et al., 2001) Nevertheless, several lines of  
587 experimental controls and results support our conclusion that the observed connectivity was not due  
588 merely to sensory afferent inflow.

589 First, we return to the finding of connectivity within and between the IG and VH. These regions would  
590 not be expected to receive meaningful direct afferent input in our preparation. The primary source of such  
591 input would be muscle afferents, in particular the 1a, 1b, and group II fibers. While 1a afferents indeed  
592 synapse directly onto motoneurons, in our preparation muscle length was held constant. Activity in 1b and  
593 Group II afferents would likewise be negligible in our preparation, as muscles were not developing tension  
594 and were held in a neutral, unstrained position.

595 A stronger argument against an exclusive role of sensory afferent feedback driving our connectivity  
596 results and in support of a role for persistent activity in an intrinsic network is that sDH and dDH  
597 connectivity was robust in animals anesthetized with urethane. As mentioned in Results, we chose  
598 urethane specifically for its documented ability to block spontaneous dorsal root activity.(Daló and  
599 Hackman, 2013; Hara and Harris, 2002) It is also worth reiterating that we chose an electrode implantation  
600 site whose corresponding dermatome primarily included the glabrous skin of the plantar surface of the  
601 hindpaw. This region had no physical contact with the surgical field, instruments, etc., further minimizing  
602 undue afferent feedback. Although deafferentation would have wholly eliminated natural sensory afferent  
603 activity, it could have paradoxically increased discharge in the residual dorsal roots, 2<sup>nd</sup> order neurons, or  
604 local dorsal horn neurons.(Eschenfelder et al., 2000)

605 A counterpoint to this interpretation would be that the activity we observed within and between the IG  
606 and VH is related to polysynaptic activation of premotor interneurons and other interneurons intercalated  
607 amongst motor pools from latent connections to the sDH and dDH. We addressed this potential confound  
608 by characterizing functional connectivity in a separate cohort of rats anesthetized with isoflurane, an  
609 anesthetic known to preferentially depress ventral horn cells relative to the dorsal horn cells, including  
610 premotor interneurons.(Kim et al., 2007; Kohno and Wakai, 2005) We found that functional connectivity in  
611 the IG and VH (as well as the sDH and dDH) persisted largely unchanged in animals administered  
612 isoflurane, and therefore choice of anesthetic agent could not explain our findings. In fact, we find the  
613 spatiotemporal patterns of connectivity to be remarkably consistent across the two anesthetic agents. This  
614 finding, in conjunction with other experimental controls, further supports the notion that the results are not  
615 merely an epiphenomenon or primarily reflective of afferent transmission.

616 Separate from afferent feedback, some degree of spontaneous, possibly random, neural transmission  
617 would presumably be expected in the spinal cord regardless of whether a structured intrinsic network is  
618 active during unconsciousness. Therefore, it was important to understand how the proportion of functionally  
619 connected units we observed and their topology compared to that which might be expected by populations  
620 of statistically matched, interconnected neurons firing randomly. We found, on average, 105% *more* pairs  
621 of functionally connected units across rats in the observed compared to the synthetic dataset, indicating  
622 that the observed proportion of functionally connected units was unlikely to occur due to chance. This  
623 finding reinforces the view that the spinal cord indeed possesses intrinsic networks active during  
624 unconsciousness, which appear to be involved in multimodal neural processing.

625 Regarding topological aspects of the correlated units, we also find a marked departure from a random  
626 structure. However, it should be reiterated that the random topology is based on the number of electrodes  
627 in each gross anatomical region, not the physiological characteristics of the regions themselves (e.g., the  
628 putative function of neurons in a given region during unconsciousness, direct measures of regional neuron  
629 density, etc.). Many of these parameters (or their influence) cannot be directly quantified. An additional  
630 consideration is that we did not characterize or predict higher-order connectivity patterns (e.g., 3, 4, 5 link  
631 connections, etc.). Thus, while we can conclude from the pairs of significantly correlated units (and their  
632 accompanying latencies) that multiple local and distant regions are functionally connected, we cannot  
633 delineate the specific pathways through which these polysynaptic connections are mediated.

634 One of the most pronounced topological features of the observed data, particularly compared to  
635 theoretical benchmarks, was the difference in within-region vs. between-region connectivity. We found  
636 significantly greater within-region connectivity than between-region connectivity (~70 vs ~30%), opposite  
637 our prediction. This finding appears to be driven in part by the sDH. While the sDH contains the most  
638 theoretical between-region connections, it is a particularly challenging region to study *in vivo* using  
639 implanted microelectrode arrays. Indeed, its proximity to the electrode insertion site increases the likelihood  
640 of tissue damage, which is compounded by the small size and fragility of the cells it contains (e.g., in the  
641 SG). The sDH also contains a preponderance of between-region circuits dedicated to transmission of  
642 nociceptive neural activity from the periphery, but nociception was not a component of our protocol. These  
643 considerations presumably reduced the overall proportion of between-region connections we observed,

644 which was shifted further towards a majority of within-region connections by the four-fold

645 overrepresentation of VH-VH connections.

646

647 *Possible function(s) of neural transmission in intrinsic spinal networks during unconsciousness*

648

649 One potential explanation for the presence of persistent activity during unconsciousness could be re-  
650 activation of salient experience-dependent patterns of neural transmission to stabilize circuit-level synaptic  
651 connectivity. During sleep, for example, specific patterns of hippocampal and cortical activation emerge  
652 that mirror those experienced during wakefulness.(Puentes-Mestril and Aton, 2017; Wei et al., 2016)  
653 Persistence of these patterns is believed to be integral to memory encoding and consolidation. It is  
654 reasonable to think that such a mechanism might be a generalized feature of complex neural circuits.

655 Several of our findings are consistent with this idea and suggest putative mechanisms by which it could  
656 occur. First, our finding of functional connectivity between superficial and deep regions indicates that the  
657 pathways nominally required for stabilization of multimodal patterns of neural transmission remain active  
658 during unconsciousness. Next, we find a substantial portion of connection latencies compatible with mono-  
659 and di-synaptic interactions, offering a link between broad, network-level neural synchrony and the  
660 millisecond-timescale synaptic interactions necessary for driving plasticity and shaping behavior.(Brzosko  
661 et al., 2019; Feldman, 2012) And finally, we show that both excitatory and inhibitory connections with the  
662 full complement of latencies are widely distributed throughout the gray matter, providing another  
663 mechanism for bi-directional modification of synaptic interactions (besides spike-timing-dependent  
664 plasticity) to precisely shape circuit-level neural transmission and behavior.

665 Although our study cannot confirm or refute whether this is indeed the purpose of the persistent  
666 network activity we observed, it is a useful framework for developing new hypotheses to probe this  
667 potential functionality. For example, we would hypothesize that if a specific salient pattern of neural  
668 transmission was introduced and reinforced prior to unconsciousness, whether naturally or as part of a  
669 targeted, plasticity-promoting rehabilitation intervention,(Jo and Perez, 2020; McPherson et al., 2015;  
670 Thompson et al., 2013) we may find evidence of this pattern in the topology of active neurons during  
671 unconsciousness. We would also hypothesize that specific patterns of functional connectivity during

672 unconsciousness may play a role in the chronification process after trauma or disease. Here, network  
673 activity could potentially lead either to adaptive or maladaptive reinforcement of (in)appropriate patterns of  
674 neural activity, contributing to amelioration or persistence of debilitating sensory and motor impairments  
675 (e.g., spinal cord injury-related neuropathic pain; movement impairments after stroke, spinal cord injury, or  
676 multiple sclerosis, etc.).

677 Other possible functions of persistent spontaneous connectivity during unconsciousness also exist. For  
678 example, it could reflect latent activity in spinal central pattern generators (although evidence for  
679 unconscious activity in these circuits has yet to be introduced to the literature). Alternatively, it could play a  
680 role in mediating inattentive physiological processes, qualitatively analogous to the default mode (or task-  
681 negative) network in the brain (Fox et al., 2005; Greicius et al., 2003; Raichle et al., 2001) or interoceptive  
682 networks. (Damasio and Carvalho, 2013; Gilam et al., 2020; Sternson, 2020) However, it is difficult to  
683 extrapolate our results to these latter two constructs because we interrogated rather granular connectivity  
684 within a single spinal segment and did not directly consider transmission between spinal and supraspinal  
685 centers or sympathetic outflow. Studies of spinal BOLD signaling may offer additional evidence in support  
686 of or against these theories. It is also possible that the persistent spontaneous activity is not directly  
687 involved in synaptic stabilization or in maintenance of ongoing physiological processes. Rather, it may  
688 reflect a nominal basal state of activity required simply to prevent undue extinction of learned patterns of  
689 neural transmission. (Dunsmoor et al., 2015) Nevertheless, our results suggest that structured spontaneous  
690 activity during unconsciousness is a fundamental property of complex neural systems and is not relegated  
691 to supraspinal networks.

692  
693 **Author contributions:** JGM: conceptualization, data curation, formal analysis, funding acquisition,  
694 investigation, methodology, project administration, resources, software, supervision, validation, writing and  
695 editing. MFB: data curation, formal analysis, investigation, methodology, validation.

696  
697 **Funding:** This work was funded by the National Institutes of Health grants 5R01-NS111234 and K12-  
698 HD073945, both to JGM.

699  
700 **Competing interests:** The authors declare competing interests.

701  
702  
703

## 704 References

- 705
- 706 Abel, T., Havekes, R., Saletin, J.M., Walker, M.P., 2013. Sleep, plasticity and memory from molecules to whole-brain  
707 networks. *Current Biology*. <https://doi.org/10.1016/j.cub.2013.07.025>
- 708 Barry, R.L., Smith, S.A., Dula, A.N., Gore, J.C., 2014. Resting state functional connectivity in the human spinal cord.  
709 *eLife*. <https://doi.org/10.7554/eLife.02812>
- 710 Brzosko, Z., Mierau, S.B., Paulsen, O., 2019. Neuromodulation of Spike-Timing-Dependent Plasticity: Past, Present,  
711 and Future. *Neuron*. <https://doi.org/10.1016/j.neuron.2019.05.041>
- 712 Chen, L.M., Mishra, A., Yang, P.F., Wang, F., Gore, J.C., 2015. Injury alters intrinsic functional connectivity within the  
713 primate spinal cord. *Proceedings of the National Academy of Sciences of the United States of America*.  
714 <https://doi.org/10.1073/pnas.1424106112>
- 715 Conrad, B.N., Barry, R.L., Rogers, B.P., Maki, S., Mishra, A., Thukral, S., Sriram, S., Bhatia, A., Pawate, S., Gore,  
716 J.C., Smith, S.A., 2018. Multiple sclerosis lesions affect intrinsic functional connectivity of the spinal cord. *Brain*.  
717 <https://doi.org/10.1093/brain/awy083>
- 718 Daló, N.L., Hackman, J.C., 2013. The anesthetic urethane blocks excitatory amino acid responses but not GABA  
719 responses in isolated frog spinal cords. *Journal of Anesthesia*. <https://doi.org/10.1007/s00540-012-1466-7>
- 720 Damasio, A., Carvalho, G.B., 2013. The nature of feelings: Evolutionary and neurobiological origins. *Nature Reviews*  
721 *Neuroscience*. <https://doi.org/10.1038/nrn3403>
- 722 Demertzi, A., Tagliazucchi, E., Dehaene, S., Deco, G., Bartfeld, P., Raimondo, F., Martial, C., Fernández-Espejo, D.,  
723 Rohaut, B., Voss, H.U., Schiff, N.D., Owen, A.M., Laureys, S., Naccache, L., Sitt, J.D., 2019. Human  
724 consciousness is supported by dynamic complex patterns of brain signal coordination. *Science Advances*.  
725 <https://doi.org/10.1126/sciadv.aat7603>
- 726 Dunsmoor, J.E., Niv, Y., Daw, N., Phelps, E.A., 2015. Rethinking Extinction. *Neuron*.  
727 <https://doi.org/10.1016/j.neuron.2015.09.028>
- 728 Eippert, F., Kong, Y., Winkler, A., Andersson, J., Finsterbusch, J., Büchel, C., Brooks, J., Tracey, I., 2016.  
729 Investigating resting-state functional connectivity in the cervical spinal cord at 3T. Investigating resting-state  
730 functional connectivity in the cervical spinal cord at 3 T. <https://doi.org/10.1101/073569>
- 731 Eippert, F., Tracey, I., 2014. The spinal cord is never at rest. *eLife* 3. <https://doi.org/10.7554/eLife.03811>
- 732 Eschenfelder, S., Häbler, H.J., Jänig, W., 2000. Dorsal root section elicits signs of neuropathic pain rather than  
733 reversing them in rats with L5 spinal nerve injury. *Pain*. [https://doi.org/10.1016/S0304-3959\(00\)00285-2](https://doi.org/10.1016/S0304-3959(00)00285-2)
- 734 Feldman, D.E., 2012. The Spike-Timing Dependence of Plasticity. *Neuron*.  
735 <https://doi.org/10.1016/j.neuron.2012.08.001>
- 736 Fox, M.D., Snyder, A.Z., Vincent, J.L., Corbetta, M., van Essen, D.C., Raichle, M.E., 2005. The human brain is  
737 intrinsically organized into dynamic, anticorrelated functional networks. *Proceedings of the National Academy of*  
738 *Sciences of the United States of America*. <https://doi.org/10.1073/pnas.0504136102>
- 739 Fujisawa, S., Amarasingham, A., Harrison, M.T., Buzsáki, G., 2008. Behavior-dependent short-term assembly  
740 dynamics in the medial prefrontal cortex. *Nature Neuroscience*. <https://doi.org/10.1038/nn.2134>
- 741 Gerstein, G.L., Aertsen, A.M.H.J., 1985. Representation of cooperative firing activity among simultaneously recorded  
742 neurons. *Journal of Neurophysiology*. <https://doi.org/10.1152/jn.1985.54.6.1513>
- 743 Gilam, G., Gross, J.J., Wager, T.D., Keefe, F.J., Mackey, S.C., 2020. What Is the Relationship between Pain and  
744 Emotion? Bridging Constructs and Communities. *Neuron*. <https://doi.org/10.1016/j.neuron.2020.05.024>
- 745 Grasshoff, C., Antkowiak, B., 2006. Effects of isoflurane and enflurane on GABA and glycine receptors contribute  
746 equally to depressant actions on spinal ventral horn neurones in rats. *British Journal of Anaesthesia*.  
747 <https://doi.org/10.1093/bja/ael239>
- 748 Greicius, M.D., Krasnow, B., Reiss, A.L., Menon, V., 2003. Functional connectivity in the resting brain: A network  
749 analysis of the default mode hypothesis. *Proceedings of the National Academy of Sciences of the United States*  
750 *of America*. <https://doi.org/10.1073/pnas.0135058100>
- 751 Hara, K., Harris, R.A., 2002. The anesthetic mechanism of urethane: The effects on neurotransmitter-gated ion  
752 channels. *Anesthesia and Analgesia*. <https://doi.org/10.1213/00000539-200202000-00015>
- 753 Jo, H.J., Perez, M.A., 2020. Corticospinal-motor neuronal plasticity promotes exercise-mediated recovery in humans  
754 with spinal cord injury. *Brain*. <https://doi.org/10.1093/brain/awaa052>
- 755 Kim, J., Yao, A., Atherley, R., Carstens, E., Jinks, S.L., Antognini, J.F., 2007. Neurons in the ventral spinal cord are  
756 more depressed by isoflurane, halothane, and propofol than are neurons in the dorsal spinal cord. *Anesthesia*  
757 *and Analgesia*. <https://doi.org/10.1213/01.ane.0000280483.17854.56>
- 758 Kohno, T., Wakai, A., 2005. Action of isoflurane on the substantia gelatinosa neurons of the adult rat spinal cord.  
759 *International Congress Series*. <https://doi.org/10.1016/j.ics.2005.07.073>
- 760 Kong, Y., Eippert, F., Beckmann, C.F., Andersson, J., Finsterbusch, J., Büchel, C., Tracey, I., Brooks, J.C.W., 2014.  
761 Intrinsically organized resting state networks in the human spinal cord. *Proceedings of the National Academy of*  
762 *Sciences of the United States of America*. <https://doi.org/10.1073/pnas.1414293111>
- 763 Lindquist, M.A., Mejia, A., 2015. Zen and the art of multiple comparisons. *Psychosomatic Medicine*.  
764 <https://doi.org/10.1097/PSY.0000000000000148>



- 765 Logothetis, N.K., Pauls, J., Augath, M., Trinath, T., Oeltermann, A., 2001. Neurophysiological investigation of the  
766 basis of the fMRI signal. *Nature*. <https://doi.org/10.1038/35084005>
- 767 Mashour, G.A., Hudetz, A.G., 2018. Neural Correlates of Unconsciousness in Large-Scale Brain Networks. *Trends in*  
768 *Neurosciences*. <https://doi.org/10.1016/j.tins.2018.01.003>
- 769 McPherson, J.G., Miller, R.R., Perlmutter, S.I., 2015. Targeted, activity-dependent spinal stimulation produces long-  
770 lasting motor recovery in chronic cervical spinal cord injury. *Proceedings of the National Academy of Sciences of*  
771 *the United States of America* 112, 12193–12198. <https://doi.org/10.1073/pnas.1505383112>
- 772 Murayama, Y., Bießmann, F., Meinecke, F.C., Müller, K.R., Augath, M., Oeltermann, A., Logothetis, N.K., 2010.  
773 Relationship between neural and hemodynamic signals during spontaneous activity studied with temporal kernel  
774 CCA. *Magnetic Resonance Imaging*. <https://doi.org/10.1016/j.mri.2009.12.016>
- 775 Pastore, V.P., Massobrio, P., Godjoski, A., Martinoia, S., 2018. Identification of excitatory-inhibitory links and network  
776 topology in large-scale neuronal assemblies from multi-electrode recordings. *PLoS Computational Biology*.  
777 <https://doi.org/10.1371/journal.pcbi.1006381>
- 778 Puentes-Mestral, C., Aton, S.J., 2017. Linking network activity to synaptic plasticity during sleep: Hypotheses and  
779 recent data. *Frontiers in Neural Circuits*. <https://doi.org/10.3389/fncir.2017.00061>
- 780 Quiroga, R.Q., Nadasdy, Z., Ben-Shaul, Y., 2004. Unsupervised spike detection and sorting with wavelets and  
781 superparamagnetic clustering. *Neural Computation*. <https://doi.org/10.1162/089976604774201631>
- 782 Raichle, M.E., MacLeod, A.M., Snyder, A.Z., Powers, W.J., Gusnard, D.A., Shulman, G.L., 2001. A default mode of  
783 brain function. *Proceedings of the National Academy of Sciences of the United States of America*.  
784 <https://doi.org/10.1073/pnas.98.2.676>
- 785 Sanchez-Vives, M. v., Massimini, M., Mattia, M., 2017. Shaping the Default Activity Pattern of the Cortical Network.  
786 *Neuron*. <https://doi.org/10.1016/j.neuron.2017.05.015>
- 787 Shao, X., Chen, P., 1987. Normalized auto- and Cross-covariance functions for neuronal spike train analysis.  
788 *International Journal of Neuroscience*. <https://doi.org/10.3109/00207458708985942>
- 789 Shao, X.M., Tsau, Y., 1996. Measure and statistical test for cross-correlation between paired neuronal spike trains  
790 with small sample size. *Journal of Neuroscience Methods*. [https://doi.org/10.1016/S0165-0270\(96\)00112-4](https://doi.org/10.1016/S0165-0270(96)00112-4)
- 791 Steriade, M., Nuñez, A., Amzica, F., 1993. A novel slow inferior to 1 Hz oscillation of neocortical neurons in vivo:  
792 depolarizing and hyperpolarizing components. *The Journal of neuroscience : the official journal of the Society for*  
793 *Neuroscience*.
- 794 Sternson, S.M., 2020. Exploring internal state-coding across the rodent brain. *Current Opinion in Neurobiology*.  
795 <https://doi.org/10.1016/j.conb.2020.08.009>
- 796 Thompson, A.K., Pomerantz, F.R., Wolpaw, J.R., 2013. Operant conditioning of a spinal reflex can improve  
797 locomotion after spinal cord injury in humans. *Journal of Neuroscience*.  
798 <https://doi.org/10.1523/JNEUROSCI.3968-12.2013>
- 799 Tsodyks, M., Kenet, T., Grinvald, A., Arieli, A., 1999. Linking spontaneous activity of single cortical neurons and the  
800 underlying functional architecture. *Science*. <https://doi.org/10.1126/science.286.5446.1943>
- 801 Vakorin, V.A., Krakovska, O.O., Borowsky, R., Sarty, G.E., 2007. Inferring neural activity from BOLD signals through  
802 nonlinear optimization. *NeuroImage*. <https://doi.org/10.1016/j.neuroimage.2007.06.033>
- 803 Wei, Y., Krishnan, G.P., Bazhenov, M., 2016. Synaptic mechanisms of memory consolidation during sleep slow  
804 oscillations. *Journal of Neuroscience*. <https://doi.org/10.1523/JNEUROSCI.3648-15.2016>
- 805 Wenzel, M., Han, S., Smith, E.H., Hoel, E., Greger, B., House, P.A., Yuste, R., 2019. Reduced Repertoire of Cortical  
806 Microstates and Neuronal Ensembles in Medically Induced Loss of Consciousness. *Cell Systems*.  
807 <https://doi.org/10.1016/j.cels.2019.03.007>
- 808 Wu, T.L., Yang, P.F., Wang, F., Shi, Z., Mishra, A., Wu, R., Chen, L.M., Gore, J.C., 2019. Intrinsic functional  
809 architecture of the non-human primate spinal cord derived from fMRI and electrophysiology. *Nature*  
810 *Communications*. <https://doi.org/10.1038/s41467-019-09485-3>
- 811  
812  
813  
814  
815  
816



817  
818  
819  
820  
821  
822  
823  
824  
825  
826  
827  
828  
829  
830  
831  
832  
833  
834  
835

### **Supplementary Materials**

836

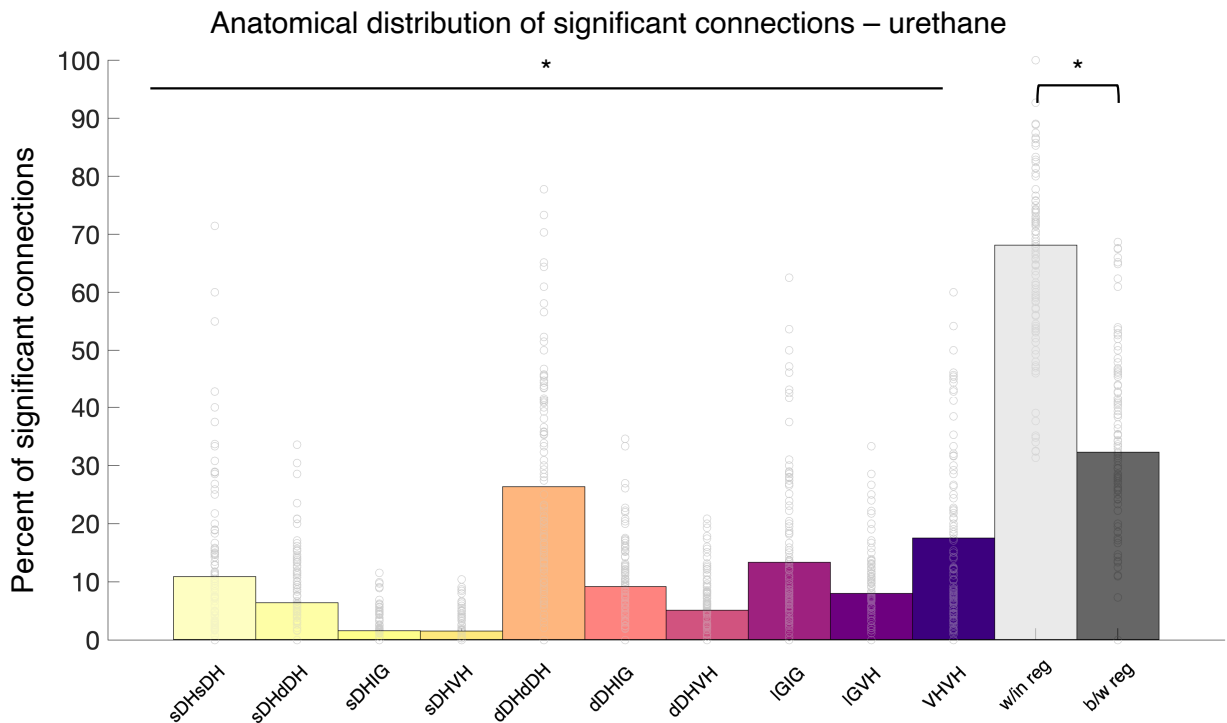

837

838

**Figure 5 – figure supplement 1. Summary topological data for urethane-anesthetized animals.** (a) Proportion of significant connections by anatomical region ( $N = 13$  animals). From left to right, bar plots indicate connections from sDH-sDH, sDH-dDH, sDH-IG, sDH-VH, dDH-dDH, dDH-IG, dDH-VH, IG-IG, IG-VH, VH-VH. Darkening color gradient from left to right qualitatively indicates depth from dorsal surface of spinal cord. Grayscale plots are the proportion of within and between-region connections, respectively. Significant connections are not uniformly distributed anatomically, with an overall main effect of connection location ( $P < 0.0001$ ) and significantly more within region than between region connections ( $P < 0.0001$ ). (b) Gross anatomical distribution of the most connected nodes ( $N = 13$  animals). From top to bottom (light to dark): sDH, dDH, IG, and VH. Significant main effect of anatomical region on proportion of most connected nodes,  $P=0.009$ . This figure is analogous to Figure 5a in the main body, however here we present raw data (gray circles) superimposed onto the summary bar plots.

849

### Anatomical distribution of significant connections – isoflurane

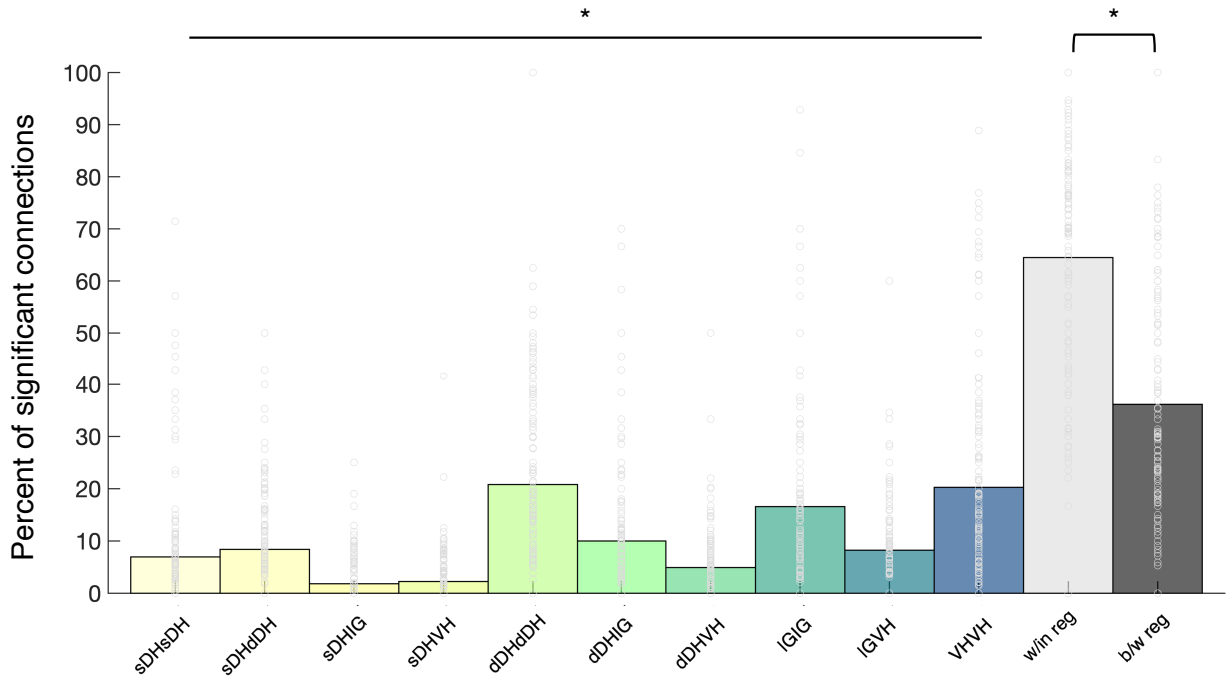

850

851

**Figure 7 – figure supplement 1. Summary topological data for isoflurane-anesthetized animals.** (a) Proportion of significant connections by anatomical region ( $N = 9$  animals). From left to right, bar plots indicate connections from sDH-sDH, sDH-dDH, sDH-IG, sDH-VH, dDH-dDH, dDH-IG, dDH-VH, IG-IG, IG-VH, VH-VH. Darkening color gradient from left to right qualitatively indicates depth from dorsal surface of spinal cord. Grayscale plots are the proportion of within and between-region connections, respectively. Significant connections are not uniformly distributed anatomically, with an overall main effect of connection location ( $P < 0.0001$ ) and significantly more within region than between region connections ( $P < 0.005$ ). This figure is analogous to Figure 7a in the main body, however here we present raw data (gray circles) superimposed onto the summary bar plots.

860

861

862

863

864

865  
866

### Supplementary Table 1.

#### Average number of units per anatomical region – urethane

|       | N  | Mean    | Std. Deviation | Std. Error | 95% Confidence Interval for Mean |             | Minimum | Maximum |
|-------|----|---------|----------------|------------|----------------------------------|-------------|---------|---------|
|       |    |         |                |            | Lower Bound                      | Upper Bound |         |         |
| sDH   | 13 | 11.1288 | 9.54466        | 2.64721    | 5.3610                           | 16.8966     | .00     | 29.00   |
| dDH   | 13 | 24.9359 | 9.94266        | 2.75760    | 18.9276                          | 30.9442     | 9.00    | 38.71   |
| IG    | 13 | 16.1181 | 7.63001        | 2.11618    | 11.5073                          | 20.7289     | 5.05    | 29.00   |
| VH    | 13 | 13.9456 | 6.49604        | 1.80168    | 10.0201                          | 17.8711     | 5.63    | 29.00   |
| Total | 52 | 16.5321 | 9.77324        | 1.35530    | 13.8112                          | 19.2530     | .00     | 38.71   |

#### ANOVA

|                   | Sum of Squares | df | Mean Square | F     | Sig. |
|-------------------|----------------|----|-------------|-------|------|
| Anatomical region | 1386.855       | 3  | 462.285     | 6.368 | .001 |
| Within Groups     | 3484.472       | 48 | 72.593      |       |      |
| Total             | 4871.327       | 51 |             |       |      |

#### Bonferroni

| (I) region | (J) region | Mean Difference (I-J) | Std. Error | Sig.  | 95% Confidence Interval |             |
|------------|------------|-----------------------|------------|-------|-------------------------|-------------|
|            |            |                       |            |       | Lower Bound             | Upper Bound |
| sDH        | dDH        | -13.80711*            | 3.34188    | .001  | -23.0040                | -4.6102     |
|            | IG         | -4.98928              | 3.34188    | .852  | -14.1862                | 4.2077      |
|            | VH         | -2.81677              | 3.34188    | 1.000 | -12.0137                | 6.3802      |
| dDH        | sDH        | 13.80711*             | 3.34188    | .001  | 4.6102                  | 23.0040     |
|            | IG         | 8.81782               | 3.34188    | .067  | -.3791                  | 18.0148     |
|            | VH         | 10.99034*             | 3.34188    | .011  | 1.7934                  | 20.1873     |
| IG         | sDH        | 4.98928               | 3.34188    | .852  | -4.2077                 | 14.1862     |
|            | dDH        | -8.81782              | 3.34188    | .067  | -18.0148                | .3791       |
|            | VH         | 2.17252               | 3.34188    | 1.000 | -7.0244                 | 11.3695     |
| VH         | sDH        | 2.81677               | 3.34188    | 1.000 | -6.3802                 | 12.0137     |
|            | dDH        | -10.99034*            | 3.34188    | .011  | -20.1873                | -1.7934     |
|            | IG         | -2.17252              | 3.34188    | 1.000 | -11.3695                | 7.0244      |

\*. The mean difference is significant at the 0.05 level.

867  
868

869 **Supplementary Table 2.**

870

**Anatomical region of synchronous unit pairs – urethane**

| Source                                      | Type III Sum of Squares | df       | Mean Square | F        | Sig.  |      |
|---------------------------------------------|-------------------------|----------|-------------|----------|-------|------|
| Anatomical region of synchronous unit pairs | Sphericity Assumed      | 6899.267 | 9           | 766.585  | 9.277 | .000 |
|                                             | Greenhouse-Geisser      | 6899.267 | 3.077       | 2242.502 | 9.277 | .000 |
|                                             | Huynh-Feldt             | 6899.267 | 4.258       | 1620.313 | 9.277 | .000 |
|                                             | Lower-bound             | 6899.267 | 1.000       | 6899.267 | 9.277 | .010 |
| Error(region)                               | Sphericity Assumed      | 8924.109 | 108         | 82.631   |       |      |
|                                             | Greenhouse-Geisser      | 8924.109 | 36.919      | 241.721  |       |      |
|                                             | Huynh-Feldt             | 8924.109 | 51.096      | 174.654  |       |      |
|                                             | Lower-bound             | 8924.109 | 12.000      | 743.676  |       |      |

871

**Proportion of significant connections per region – urethane**

| region  | Mean   | Std. Error | 95% Confidence Interval |             |
|---------|--------|------------|-------------------------|-------------|
|         |        |            | Lower Bound             | Upper Bound |
| sDH-sDH | 9.326  | 2.841      | 3.136                   | 15.515      |
| sDH-dDH | 6.266  | 1.531      | 2.931                   | 9.601       |
| sDH-IG  | 1.463  | .359       | .681                    | 2.246       |
| sDH-VH  | 1.230  | .422       | .309                    | 2.150       |
| dDH-dDH | 24.947 | 3.575      | 17.158                  | 32.736      |
| dDH-IG  | 9.446  | 1.704      | 5.732                   | 13.159      |
| dDH-VH  | 4.286  | .755       | 2.642                   | 5.930       |
| IG-IG   | 17.267 | 3.743      | 9.111                   | 25.422      |
| IG-VH   | 8.374  | 1.653      | 4.771                   | 11.976      |
| VH-VH   | 17.397 | 3.672      | 9.395                   | 25.398      |

872

Pairwise Comparisons

| (I) region | (J) region | Mean Difference (I-J) | Std. Error | Sig. <sup>a</sup> | 95% Confidence Interval for Difference <sup>a</sup> |             |
|------------|------------|-----------------------|------------|-------------------|-----------------------------------------------------|-------------|
|            |            |                       |            |                   | Lower Bound                                         | Upper Bound |
| sDH-sDH    | sDH-dDH    | 3.059                 | 2.429      | 1.000             | -7.285                                              | 13.404      |
|            | sDH-IG     | 7.862                 | 2.790      | .699              | -4.019                                              | 19.744      |
|            | sDH-VH     | 8.096                 | 2.835      | .651              | -3.977                                              | 20.169      |
|            | dDH-dDH    | -15.621               | 4.431      | .188              | -34.490                                             | 3.248       |
|            | dDH-IG     | -.120                 | 3.927      | 1.000             | -16.842                                             | 16.602      |
|            | dDH-VH     | 5.040                 | 3.099      | 1.000             | -8.158                                              | 18.238      |
|            | IG-IG      | -7.941                | 5.112      | 1.000             | -29.710                                             | 13.828      |
|            | IG-VH      | .952                  | 3.672      | 1.000             | -14.685                                             | 16.589      |
|            | VH-VH      | -8.071                | 5.648      | 1.000             | -32.119                                             | 15.977      |
| sDH-dDH    | sDH-sDH    | -3.059                | 2.429      | 1.000             | -13.404                                             | 7.285       |
|            | sDH-IG     | 4.803                 | 1.363      | .188              | -.999                                               | 10.605      |
|            | sDH-VH     | 5.037                 | 1.351      | .130              | -.716                                               | 10.789      |
|            | dDH-dDH    | -18.681*              | 3.426      | .007              | -33.271                                             | -4.090      |
|            | dDH-IG     | -3.179                | 2.410      | 1.000             | -13.443                                             | 7.085       |
|            | dDH-VH     | 1.980                 | 1.429      | 1.000             | -4.104                                              | 8.065       |
|            | IG-IG      | -11.000               | 4.512      | 1.000             | -30.213                                             | 8.213       |
|            | IG-VH      | -2.108                | 2.625      | 1.000             | -13.286                                             | 9.071       |
|            | VH-VH      | -11.130               | 4.921      | 1.000             | -32.083                                             | 9.822       |
| sDH-IG     | sDH-sDH    | -7.862                | 2.790      | .699              | -19.744                                             | 4.019       |
|            | sDH-dDH    | -4.803                | 1.363      | .188              | -10.605                                             | .999        |
|            | sDH-VH     | .234                  | .209       | 1.000             | -.656                                               | 1.124       |
|            | dDH-dDH    | -23.483*              | 3.513      | .001              | -38.442                                             | -8.525      |
|            | dDH-IG     | -7.982*               | 1.756      | .030              | -15.458                                             | -.506       |
|            | dDH-VH     | -2.823                | .683       | .062              | -5.729                                              | .084        |
|            | IG-IG      | -15.803               | 3.823      | .062              | -32.082                                             | .476        |
|            | IG-VH      | -6.910                | 1.767      | .093              | -14.435                                             | .614        |
|            | VH-VH      | -15.933               | 3.897      | .068              | -32.526                                             | .659        |
| sDH-VH     | sDH-sDH    | -8.096                | 2.835      | .651              | -20.169                                             | 3.977       |
|            | sDH-dDH    | -5.037                | 1.351      | .130              | -10.789                                             | .716        |
|            | sDH-IG     | -.234                 | .209       | 1.000             | -1.124                                              | .656        |
|            | dDH-dDH    | -23.717*              | 3.577      | .001              | -38.950                                             | -8.485      |
|            | dDH-IG     | -8.216*               | 1.710      | .019              | -15.496                                             | -.937       |
|            | dDH-VH     | -3.056*               | .670       | .029              | -5.909                                              | -.203       |
|            | IG-IG      | -16.037               | 3.883      | .063              | -32.571                                             | .497        |
|            | IG-VH      | -7.144                | 1.753      | .069              | -14.607                                             | .318        |
|            | VH-VH      | -16.167               | 3.843      | .055              | -32.530                                             | .196        |
| dDH-dDH    | sDH-sDH    | 15.621                | 4.431      | .188              | -3.248                                              | 34.490      |



|        |         |          |       |       |         |        |
|--------|---------|----------|-------|-------|---------|--------|
|        | sDH-dDH | 18.681*  | 3.426 | .007  | 4.090   | 33.271 |
|        | sDH-IG  | 23.483*  | 3.513 | .001  | 8.525   | 38.442 |
|        | sDH-VH  | 23.717*  | 3.577 | .001  | 8.485   | 38.950 |
|        | dDH-IG  | 15.501   | 4.090 | .116  | -1.915  | 32.917 |
|        | dDH-VH  | 20.661*  | 3.177 | .001  | 7.132   | 34.190 |
|        | IG-IG   | 7.680    | 6.741 | 1.000 | -21.022 | 36.383 |
|        | IG-VH   | 16.573   | 4.657 | .177  | -3.256  | 36.402 |
|        | VH-VH   | 7.550    | 5.877 | 1.000 | -17.476 | 32.577 |
| dDH-IG | sDH-sDH | .120     | 3.927 | 1.000 | -16.602 | 16.842 |
|        | sDH-dDH | 3.179    | 2.410 | 1.000 | -7.085  | 13.443 |
|        | sDH-IG  | 7.982*   | 1.756 | .030  | .506    | 15.458 |
|        | sDH-VH  | 8.216*   | 1.710 | .019  | .937    | 15.496 |
|        | dDH-dDH | -15.501  | 4.090 | .116  | -32.917 | 1.915  |
|        | dDH-VH  | 5.160    | 1.781 | .602  | -2.423  | 12.742 |
|        | IG-IG   | -7.821   | 4.459 | 1.000 | -26.810 | 11.168 |
|        | IG-VH   | 1.072    | 2.854 | 1.000 | -11.079 | 13.223 |
|        | VH-VH   | -7.951   | 3.330 | 1.000 | -22.128 | 6.227  |
| dDH-VH | sDH-sDH | -5.040   | 3.099 | 1.000 | -18.238 | 8.158  |
|        | sDH-dDH | -1.980   | 1.429 | 1.000 | -8.065  | 4.104  |
|        | sDH-IG  | 2.823    | .683  | .062  | -.084   | 5.729  |
|        | sDH-VH  | 3.056*   | .670  | .029  | .203    | 5.909  |
|        | dDH-dDH | -20.661* | 3.177 | .001  | -34.190 | -7.132 |
|        | dDH-IG  | -5.160   | 1.781 | .602  | -12.742 | 2.423  |
|        | IG-IG   | -12.981  | 4.184 | .412  | -30.799 | 4.838  |
|        | IG-VH   | -4.088   | 2.010 | 1.000 | -12.645 | 4.469  |
|        | VH-VH   | -13.111  | 3.940 | .271  | -29.887 | 3.665  |
| IG-IG  | sDH-sDH | 7.941    | 5.112 | 1.000 | -13.828 | 29.710 |
|        | sDH-dDH | 11.000   | 4.512 | 1.000 | -8.213  | 30.213 |
|        | sDH-IG  | 15.803   | 3.823 | .062  | -.476   | 32.082 |
|        | sDH-VH  | 16.037   | 3.883 | .063  | -.497   | 32.571 |
|        | dDH-dDH | -7.680   | 6.741 | 1.000 | -36.383 | 21.022 |
|        | dDH-IG  | 7.821    | 4.459 | 1.000 | -11.168 | 26.810 |
|        | dDH-VH  | 12.981   | 4.184 | .412  | -4.838  | 30.799 |
|        | IG-VH   | 8.893    | 2.963 | .497  | -3.723  | 21.509 |
|        | VH-VH   | -.130    | 5.434 | 1.000 | -23.270 | 23.010 |
| IG-VH  | sDH-sDH | -.952    | 3.672 | 1.000 | -16.589 | 14.685 |
|        | sDH-dDH | 2.108    | 2.625 | 1.000 | -9.071  | 13.286 |
|        | sDH-IG  | 6.910    | 1.767 | .093  | -.614   | 14.435 |
|        | sDH-VH  | 7.144    | 1.753 | .069  | -.318   | 14.607 |
|        | dDH-dDH | -16.573  | 4.657 | .177  | -36.402 | 3.256  |
|        | dDH-IG  | -1.072   | 2.854 | 1.000 | -13.223 | 11.079 |

|       |         |        |       |       |         |        |
|-------|---------|--------|-------|-------|---------|--------|
|       | dDH-VH  | 4.088  | 2.010 | 1.000 | -4.469  | 12.645 |
|       | IG-IG   | -8.893 | 2.963 | .497  | -21.509 | 3.723  |
|       | VH-VH   | -9.023 | 3.915 | 1.000 | -25.693 | 7.648  |
| VH-VH | sDH-sDH | 8.071  | 5.648 | 1.000 | -15.977 | 32.119 |
|       | sDH-dDH | 11.130 | 4.921 | 1.000 | -9.822  | 32.083 |
|       | sDH-IG  | 15.933 | 3.897 | .068  | -.659   | 32.526 |
|       | sDH-VH  | 16.167 | 3.843 | .055  | -.196   | 32.530 |
|       | dDH-dDH | -7.550 | 5.877 | 1.000 | -32.577 | 17.476 |
|       | dDH-IG  | 7.951  | 3.330 | 1.000 | -6.227  | 22.128 |
|       | dDH-VH  | 13.111 | 3.940 | .271  | -3.665  | 29.887 |
|       | IG-IG   | .130   | 5.434 | 1.000 | -23.010 | 23.270 |
|       | IG-VH   | 9.023  | 3.915 | 1.000 | -7.648  | 25.693 |

Based on estimated marginal means

a. Adjustment for multiple comparisons: Bonferroni.

\*. The mean difference is significant at the alpha = 0.05 level.

873  
874

875 **Supplementary Table 3.**

876

**Most connected nodes – urethane**

|       | N  | Mean    | Std. Deviation | Std. Error | 95% Confidence Interval for Mean |             | Minimum | Maximum |
|-------|----|---------|----------------|------------|----------------------------------|-------------|---------|---------|
|       |    |         |                |            | Lower Bound                      | Upper Bound |         |         |
| sDH   | 13 | 14.1166 | 15.35972       | 4.26002    | 4.8348                           | 23.3983     | .00     | 50.90   |
| dDH   | 13 | 35.4323 | 16.58153       | 4.59889    | 25.4122                          | 45.4524     | 13.70   | 67.59   |
| IG    | 13 | 27.4337 | 15.69728       | 4.35364    | 17.9479                          | 36.9195     | 6.41    | 57.40   |
| VH    | 13 | 23.0176 | 13.83545       | 3.83726    | 14.6569                          | 31.3782     | 3.33    | 44.57   |
| Total | 52 | 25.0000 | 16.84245       | 2.33563    | 20.3111                          | 29.6890     | .00     | 67.59   |

**ANOVA**

|                   | Sum of Squares | df | Mean Square | F     | Sig. |
|-------------------|----------------|----|-------------|-------|------|
| Anatomical region | 3082.758       | 3  | 1027.586    | 4.333 | .009 |
| Within Groups     | 11384.309      | 48 | 237.173     |       |      |
| Total             | 14467.067      | 51 |             |       |      |

**Post-hoc comparisons**

Bonferroni

| (I) region | (J) region | Mean Difference (I-J) | Std. Error | Sig.  | 95% Confidence Interval |             |
|------------|------------|-----------------------|------------|-------|-------------------------|-------------|
|            |            |                       |            |       | Lower Bound             | Upper Bound |
| sDH        | dDH        | -21.31574*            | 6.04054    | .006  | -37.9395                | -4.6920     |
|            | IG         | -13.31714             | 6.04054    | .194  | -29.9409                | 3.3066      |
|            | VH         | -8.90100              | 6.04054    | .883  | -25.5247                | 7.7227      |
| dDH        | sDH        | 21.31574*             | 6.04054    | .006  | 4.6920                  | 37.9395     |
|            | IG         | 7.99860               | 6.04054    | 1.000 | -8.6251                 | 24.6223     |
|            | VH         | 12.41475              | 6.04054    | .272  | -4.2090                 | 29.0385     |
| IG         | sDH        | 13.31714              | 6.04054    | .194  | -3.3066                 | 29.9409     |
|            | dDH        | -7.99860              | 6.04054    | 1.000 | -24.6223                | 8.6251      |
|            | VH         | 4.41615               | 6.04054    | 1.000 | -12.2076                | 21.0399     |
| VH         | sDH        | 8.90100               | 6.04054    | .883  | -7.7227                 | 25.5247     |
|            | dDH        | -12.41475             | 6.04054    | .272  | -29.0385                | 4.2090      |
|            | IG         | -4.41615              | 6.04054    | 1.000 | -21.0399                | 12.2076     |

\*. The mean difference is significant at the 0.05 level.

877

878

879 **Supplementary Table 4.**

880

**Average number of units per anatomical region – isoflurane**

|       | N  | Mean    | Std. Deviation | Std. Error | 95% Confidence Interval |             | Minimum | Maximum |
|-------|----|---------|----------------|------------|-------------------------|-------------|---------|---------|
|       |    |         |                |            | for Mean                |             |         |         |
|       |    |         |                |            | Lower Bound             | Upper Bound |         |         |
| sDH   | 9  | 8.5643  | 5.87902        | 1.95967    | 4.0453                  | 13.0833     | 1.08    | 20.60   |
| dDH   | 9  | 20.0476 | 7.98828        | 2.66276    | 13.9072                 | 26.1879     | 7.48    | 32.80   |
| IG    | 9  | 12.3987 | 3.28324        | 1.09441    | 9.8750                  | 14.9224     | 7.24    | 16.20   |
| VH    | 9  | 12.8159 | 3.89571        | 1.29857    | 9.8214                  | 15.8104     | 6.88    | 17.67   |
| Total | 36 | 13.4566 | 6.79243        | 1.13207    | 11.1584                 | 15.7549     | 1.08    | 32.80   |

881

**ANOVA**

|                   | Sum of Squares | df | Mean Square | F     | Sig. |
|-------------------|----------------|----|-------------|-------|------|
| Anatomical region | 620.145        | 3  | 206.715     | 6.650 | .001 |
| Within Groups     | 994.653        | 32 | 31.083      |       |      |
| Total             | 1614.798       | 35 |             |       |      |

882

Bonferroni

| (I) Region | (J) Region | Mean Difference (I-J) | Std. Error | Sig.  | 95% Confidence Interval |             |
|------------|------------|-----------------------|------------|-------|-------------------------|-------------|
|            |            |                       |            |       | Lower Bound             | Upper Bound |
| sDH        | dDH        | -11.48326*            | 2.62818    | .001  | -18.8746                | -4.0919     |
|            | IG         | -3.83439              | 2.62818    | .926  | -11.2257                | 3.5569      |
|            | VH         | -4.25161              | 2.62818    | .693  | -11.6429                | 3.1397      |
| dDH        | sDH        | 11.48326*             | 2.62818    | .001  | 4.0919                  | 18.8746     |
|            | IG         | 7.64887*              | 2.62818    | .039  | .2575                   | 15.0402     |
|            | VH         | 7.23164               | 2.62818    | .058  | -.1597                  | 14.6230     |
| IG         | sDH        | 3.83439               | 2.62818    | .926  | -3.5569                 | 11.2257     |
|            | dDH        | -7.64887*             | 2.62818    | .039  | -15.0402                | -.2575      |
|            | VH         | -.41722               | 2.62818    | 1.000 | -7.8086                 | 6.9741      |
| VH         | sDH        | 4.25161               | 2.62818    | .693  | -3.1397                 | 11.6429     |
|            | dDH        | -7.23164              | 2.62818    | .058  | -14.6230                | .1597       |
|            | IG         | .41722                | 2.62818    | 1.000 | -6.9741                 | 7.8086      |

\*. The mean difference is significant at the 0.05 level.

883

884

885 **Supplementary Table 5.**

886

**Anatomical region of synchronous unit pairs – isoflurane**

Measure: MEASURE\_1

| Source                                      | Type III Sum of Squares | df       | Mean Square | F        | Sig.  |      |
|---------------------------------------------|-------------------------|----------|-------------|----------|-------|------|
| Anatomical region of synchronous unit pairs | Sphericity Assumed      | 4450.184 | 9           | 494.465  | 6.517 | .000 |
|                                             | Greenhouse-Geisser      | 4450.184 | 2.479       | 1795.061 | 6.517 | .004 |
|                                             | Huynh-Feldt             | 4450.184 | 3.679       | 1209.568 | 6.517 | .001 |
|                                             | Lower-bound             | 4450.184 | 1.000       | 4450.184 | 6.517 | .034 |
| Error(region)                               | Sphericity Assumed      | 5463.208 | 72          | 75.878   |       |      |
|                                             | Greenhouse-Geisser      | 5463.208 | 19.833      | 275.460  |       |      |
|                                             | Huynh-Feldt             | 5463.208 | 29.433      | 185.614  |       |      |
|                                             | Lower-bound             | 5463.208 | 8.000       | 682.901  |       |      |

887

**Proportion of significant connections per region – isoflurane**

| region  | Mean   | Std. Error | 95% Confidence Interval |             |
|---------|--------|------------|-------------------------|-------------|
|         |        |            | Lower Bound             | Upper Bound |
| sDH-sDH | 6.865  | 2.387      | 1.360                   | 12.370      |
| sDH-dDH | 8.403  | 1.654      | 4.588                   | 12.219      |
| sDH-IG  | 1.678  | .487       | .556                    | 2.800       |
| sDH-VH  | 2.352  | .471       | 1.266                   | 3.439       |
| dDH-dDH | 21.819 | 3.825      | 12.998                  | 30.641      |
| dDH-IG  | 7.813  | 2.025      | 3.143                   | 12.482      |
| dDH-VH  | 4.579  | .611       | 3.170                   | 5.988       |
| IG-IG   | 15.605 | 2.844      | 9.047                   | 22.164      |
| IG-VH   | 8.741  | 1.578      | 5.103                   | 12.379      |
| VH-VH   | 22.144 | 6.107      | 8.061                   | 36.227      |

888

889

Pairwise Comparisons

Measure: MEASURE\_1

| (I) region | (J) region | Mean Difference (I-J) | Std. Error | Sig. <sup>a</sup> | 95% Confidence Interval for Difference <sup>a</sup> |             |
|------------|------------|-----------------------|------------|-------------------|-----------------------------------------------------|-------------|
|            |            |                       |            |                   | Lower Bound                                         | Upper Bound |
| sDH-sDH    | sDH-dDH    | -1.538                | 2.839      | 1.000             | -15.610                                             | 12.534      |
|            | sDH-IG     | 5.187                 | 2.297      | 1.000             | -6.198                                              | 16.572      |
|            | sDH-VH     | 4.513                 | 2.297      | 1.000             | -6.875                                              | 15.900      |
|            | dDH-dDH    | -14.954               | 4.892      | .704              | -39.202                                             | 9.294       |
|            | dDH-IG     | -.948                 | 3.512      | 1.000             | -18.354                                             | 16.459      |
|            | dDH-VH     | 2.286                 | 2.343      | 1.000             | -9.327                                              | 13.900      |
|            | IG-IG      | -8.740                | 2.810      | .649              | -22.668                                             | 5.188       |
|            | IG-VH      | -1.876                | 3.505      | 1.000             | -19.251                                             | 15.500      |
|            | VH-VH      | -15.279               | 7.234      | 1.000             | -51.137                                             | 20.580      |
| sDH-dDH    | sDH-sDH    | 1.538                 | 2.839      | 1.000             | -12.534                                             | 15.610      |
|            | sDH-IG     | 6.725                 | 1.476      | .084              | -.590                                               | 14.040      |
|            | sDH-VH     | 6.051                 | 1.282      | .067              | -.301                                               | 12.404      |
|            | dDH-dDH    | -13.416               | 3.871      | .383              | -32.607                                             | 5.775       |
|            | dDH-IG     | .591                  | 2.067      | 1.000             | -9.655                                              | 10.836      |
|            | dDH-VH     | 3.824                 | 1.600      | 1.000             | -4.106                                              | 11.755      |
|            | IG-IG      | -7.202                | 3.403      | 1.000             | -24.069                                             | 9.665       |
|            | IG-VH      | -.338                 | 1.524      | 1.000             | -7.893                                              | 7.217       |
|            | VH-VH      | -13.740               | 7.460      | 1.000             | -50.719                                             | 23.238      |
| sDH-IG     | sDH-sDH    | -5.187                | 2.297      | 1.000             | -16.572                                             | 6.198       |
|            | sDH-dDH    | -6.725                | 1.476      | .084              | -14.040                                             | .590        |
|            | sDH-VH     | -.674                 | .436       | 1.000             | -2.834                                              | 1.485       |
|            | dDH-dDH    | -20.141*              | 3.604      | .023              | -38.005                                             | -2.277      |
|            | dDH-IG     | -6.135                | 1.977      | .656              | -15.933                                             | 3.664       |
|            | dDH-VH     | -2.901*               | .558       | .037              | -5.666                                              | -.136       |
|            | IG-IG      | -13.927               | 3.027      | .079              | -28.932                                             | 1.078       |
|            | IG-VH      | -7.063                | 1.763      | .176              | -15.801                                             | 1.675       |
|            | VH-VH      | -20.466               | 6.413      | .575              | -52.255                                             | 11.323      |
| sDH-VH     | sDH-sDH    | -4.513                | 2.297      | 1.000             | -15.900                                             | 6.875       |
|            | sDH-dDH    | -6.051                | 1.282      | .067              | -12.404                                             | .301        |
|            | sDH-IG     | .674                  | .436       | 1.000             | -1.485                                              | 2.834       |
|            | dDH-dDH    | -19.467*              | 3.700      | .034              | -37.806                                             | -1.128      |
|            | dDH-IG     | -5.460                | 2.005      | 1.000             | -15.401                                             | 4.480       |
|            | dDH-VH     | -2.227                | .694       | .559              | -5.666                                              | 1.212       |
|            | IG-IG      | -13.253               | 2.955      | .092              | -27.901                                             | 1.395       |
|            | IG-VH      | -6.389                | 1.469      | .110              | -13.672                                             | .895        |
|            | VH-VH      | -19.791               | 6.474      | .704              | -51.881                                             | 12.298      |

|         |         |         |       |       |         |        |
|---------|---------|---------|-------|-------|---------|--------|
| dDH-dDH | sDH-sDH | 14.954  | 4.892 | .704  | -9.294  | 39.202 |
|         | sDH-dDH | 13.416  | 3.871 | .383  | -5.775  | 32.607 |
|         | sDH-IG  | 20.141* | 3.604 | .023  | 2.277   | 38.005 |
|         | sDH-VH  | 19.467* | 3.700 | .034  | 1.128   | 37.806 |
|         | dDH-IG  | 14.007  | 4.389 | .575  | -7.749  | 35.762 |
|         | dDH-VH  | 17.240  | 3.832 | .090  | -1.757  | 36.238 |
|         | IG-IG   | 6.214   | 5.674 | 1.000 | -21.910 | 34.338 |
|         | IG-VH   | 13.078  | 4.137 | .602  | -7.429  | 33.586 |
|         | VH-VH   | -.324   | 8.565 | 1.000 | -42.781 | 42.132 |
| dDH-IG  | sDH-sDH | .948    | 3.512 | 1.000 | -16.459 | 18.354 |
|         | sDH-dDH | -.591   | 2.067 | 1.000 | -10.836 | 9.655  |
|         | sDH-IG  | 6.135   | 1.977 | .656  | -3.664  | 15.933 |
|         | sDH-VH  | 5.460   | 2.005 | 1.000 | -4.480  | 15.401 |
|         | dDH-dDH | -14.007 | 4.389 | .575  | -35.762 | 7.749  |
|         | dDH-VH  | 3.234   | 1.901 | 1.000 | -6.187  | 12.655 |
|         | IG-IG   | -7.793  | 3.668 | 1.000 | -25.976 | 10.391 |
|         | IG-VH   | -.928   | 2.089 | 1.000 | -11.285 | 9.429  |
|         | VH-VH   | -14.331 | 7.187 | 1.000 | -49.957 | 21.295 |
| dDH-VH  | sDH-sDH | -2.286  | 2.343 | 1.000 | -13.900 | 9.327  |
|         | sDH-dDH | -3.824  | 1.600 | 1.000 | -11.755 | 4.106  |
|         | sDH-IG  | 2.901*  | .558  | .037  | .136    | 5.666  |
|         | sDH-VH  | 2.227   | .694  | .559  | -1.212  | 5.666  |
|         | dDH-dDH | -17.240 | 3.832 | .090  | -36.238 | 1.757  |
|         | dDH-IG  | -3.234  | 1.901 | 1.000 | -12.655 | 6.187  |
|         | IG-IG   | -11.026 | 3.085 | .326  | -26.318 | 4.266  |
|         | IG-VH   | -4.162  | 1.786 | 1.000 | -13.015 | 4.691  |
|         | VH-VH   | -17.565 | 6.306 | 1.000 | -48.823 | 13.693 |
| IG-IG   | sDH-sDH | 8.740   | 2.810 | .649  | -5.188  | 22.668 |
|         | sDH-dDH | 7.202   | 3.403 | 1.000 | -9.665  | 24.069 |
|         | sDH-IG  | 13.927  | 3.027 | .079  | -1.078  | 28.932 |
|         | sDH-VH  | 13.253  | 2.955 | .092  | -1.395  | 27.901 |
|         | dDH-dDH | -6.214  | 5.674 | 1.000 | -34.338 | 21.910 |
|         | dDH-IG  | 7.793   | 3.668 | 1.000 | -10.391 | 25.976 |
|         | dDH-VH  | 11.026  | 3.085 | .326  | -4.266  | 26.318 |
|         | IG-VH   | 6.864   | 3.702 | 1.000 | -11.487 | 25.216 |
|         | VH-VH   | -6.538  | 7.109 | 1.000 | -41.776 | 28.700 |
| IG-VH   | sDH-sDH | 1.876   | 3.505 | 1.000 | -15.500 | 19.251 |
|         | sDH-dDH | .338    | 1.524 | 1.000 | -7.217  | 7.893  |
|         | sDH-IG  | 7.063   | 1.763 | .176  | -1.675  | 15.801 |
|         | sDH-VH  | 6.389   | 1.469 | .110  | -.895   | 13.672 |
|         | dDH-dDH | -13.078 | 4.137 | .602  | -33.586 | 7.429  |



|       |         |         |       |       |         |        |
|-------|---------|---------|-------|-------|---------|--------|
|       | dDH-IG  | .928    | 2.089 | 1.000 | -9.429  | 11.285 |
|       | dDH-VH  | 4.162   | 1.786 | 1.000 | -4.691  | 13.015 |
|       | IG-IG   | -6.864  | 3.702 | 1.000 | -25.216 | 11.487 |
|       | VH-VH   | -13.403 | 6.521 | 1.000 | -45.726 | 18.920 |
| VH-VH | sDH-sDH | 15.279  | 7.234 | 1.000 | -20.580 | 51.137 |
|       | sDH-dDH | 13.740  | 7.460 | 1.000 | -23.238 | 50.719 |
|       | sDH-IG  | 20.466  | 6.413 | .575  | -11.323 | 52.255 |
|       | sDH-VH  | 19.791  | 6.474 | .704  | -12.298 | 51.881 |
|       | dDH-dDH | .324    | 8.565 | 1.000 | -42.132 | 42.781 |
|       | dDH-IG  | 14.331  | 7.187 | 1.000 | -21.295 | 49.957 |
|       | dDH-VH  | 17.565  | 6.306 | 1.000 | -13.693 | 48.823 |
|       | IG-IG   | 6.538   | 7.109 | 1.000 | -28.700 | 41.776 |
|       | IG-VH   | 13.403  | 6.521 | 1.000 | -18.920 | 45.726 |

Based on estimated marginal means

a. Adjustment for multiple comparisons: Bonferroni.

\*. The mean difference is significant at the alpha = 0.05 level.

890  
891

892 **Supplementary Table 6.**

**Most connected nodes – isoflurane**

|       | N  | Mean    | Std. Deviation | Std. Error | 95% Confidence Interval for |             | Minimum | Maximum |
|-------|----|---------|----------------|------------|-----------------------------|-------------|---------|---------|
|       |    |         |                |            | Mean                        |             |         |         |
|       |    |         |                |            | Lower Bound                 | Upper Bound |         |         |
| sDH   | 9  | 13.1643 | 9.36661        | 3.12220    | 5.9644                      | 20.3641     | 1.54    | 29.28   |
| dDH   | 9  | 34.2617 | 13.64588       | 4.54863    | 23.7725                     | 44.7508     | 12.56   | 49.39   |
| IG    | 9  | 22.5847 | 7.63018        | 2.54339    | 16.7196                     | 28.4497     | 12.36   | 31.69   |
| VH    | 9  | 29.9894 | 17.08246       | 5.69415    | 16.8587                     | 43.1202     | 10.66   | 72.05   |
| Total | 36 | 25.0000 | 14.44310       | 2.40718    | 20.1132                     | 29.8869     | 1.54    | 72.05   |

**ANOVA**

|                   | Sum of Squares | df | Mean Square | F     | Sig. |
|-------------------|----------------|----|-------------|-------|------|
| Anatomical region | 2309.323       | 3  | 769.774     | 4.935 | .006 |
| Within Groups     | 4991.788       | 32 | 155.993     |       |      |
| Total             | 7301.111       | 35 |             |       |      |

893

**Post-hoc Comparisons**

Bonferroni

| (I) region | (J) region | Mean Difference (I-J) | Std. Error | Sig.  | 95% Confidence Interval |             |
|------------|------------|-----------------------|------------|-------|-------------------------|-------------|
|            |            |                       |            |       | Lower Bound             | Upper Bound |
| sDH        | dDH        | -21.09740*            | 5.88772    | .007  | -37.6557                | -4.5391     |
|            | IG         | -9.42040              | 5.88772    | .717  | -25.9787                | 7.1379      |
|            | VH         | -16.82518*            | 5.88772    | .045  | -33.3835                | -.2669      |
| dDH        | sDH        | 21.09740*             | 5.88772    | .007  | 4.5391                  | 37.6557     |
|            | IG         | 11.67700              | 5.88772    | .336  | -4.8813                 | 28.2353     |
|            | VH         | 4.27222               | 5.88772    | 1.000 | -12.2861                | 20.8305     |
| IG         | sDH        | 9.42040               | 5.88772    | .717  | -7.1379                 | 25.9787     |
|            | dDH        | -11.67700             | 5.88772    | .336  | -28.2353                | 4.8813      |
|            | VH         | -7.40478              | 5.88772    | 1.000 | -23.9631                | 9.1535      |
| VH         | sDH        | 16.82518*             | 5.88772    | .045  | .2669                   | 33.3835     |
|            | dDH        | -4.27222              | 5.88772    | 1.000 | -20.8305                | 12.2861     |
|            | IG         | 7.40478               | 5.88772    | 1.000 | -9.1535                 | 23.9631     |

\*. The mean difference is significant at the 0.05 level.

894

895

896  
897

**Supplementary Table 7.**

**Anatomical region, anesthetic agent, and connection polarity: excitatory connections only**

| Source                               |                    | Type III Sum of Squares | df     | Mean Square | F      | Sig. |
|--------------------------------------|--------------------|-------------------------|--------|-------------|--------|------|
| Anatomical region                    | Sphericity Assumed | 9734.823                | 9      | 1081.647    | 13.981 | .000 |
|                                      | Greenhouse-Geisser | 9734.823                | 3.479  | 2798.368    | 13.981 | .000 |
|                                      | Huynh-Feldt        | 9734.823                | 4.511  | 2157.870    | 13.981 | .000 |
|                                      | Lower-bound        | 9734.823                | 1.000  | 9734.823    | 13.981 | .001 |
| Anatomical region * Anesthetic agent | Sphericity Assumed | 242.113                 | 9      | 26.901      | .348   | .957 |
|                                      | Greenhouse-Geisser | 242.113                 | 3.479  | 69.598      | .348   | .819 |
|                                      | Huynh-Feldt        | 242.113                 | 4.511  | 53.668      | .348   | .866 |
|                                      | Lower-bound        | 242.113                 | 1.000  | 242.113     | .348   | .562 |
| Error(region)                        | Sphericity Assumed | 13925.524               | 180    | 77.364      |        |      |
|                                      | Greenhouse-Geisser | 13925.524               | 69.575 | 200.151     |        |      |
|                                      | Huynh-Feldt        | 13925.524               | 90.226 | 154.340     |        |      |
|                                      | Lower-bound        | 13925.524               | 20.000 | 696.276     |        |      |

898

899

**Tests of Between-Subjects Effects**

Measure: Anesthetic agent

| Source           | Type III Sum of Squares | df | Mean Square | F        | Sig. |
|------------------|-------------------------|----|-------------|----------|------|
| Intercept        | 21272.691               | 1  | 21272.691   | 8.574E11 | .000 |
| Anesthetic agent | 7.351E-10               | 1  | 7.351E-10   | .030     | .865 |
| Error            | 4.962E-7                | 20 | 2.481E-8    |          |      |

900

**Pairwise Comparisons**

| (I) Urethane | (J) Isoflurane | Mean Difference (I-J) | Std. Error | Sig. <sup>a</sup> | 95% Confidence Interval for Difference <sup>a</sup> |             |
|--------------|----------------|-----------------------|------------|-------------------|-----------------------------------------------------|-------------|
|              |                |                       |            |                   | Lower Bound                                         | Upper Bound |
| Urethane     | Isoflurane     | 3.718E-6              | .000       | .865              | -4.134E-5                                           | 4.877E-5    |
| Isoflurane   | Urethane       | -3.718E-6             | .000       | .865              | -4.877E-5                                           | 4.134E-5    |

Based on estimated marginal means

a. Adjustment for multiple comparisons: Bonferroni.

901  
902

903  
904

**Supplementary Table 8.**

**Anatomical region, anesthetic agent, and connection polarity: inhibitory connections only**

| Source                               |                    | Type III Sum of Squares | df     | Mean Square | F      | Sig. |
|--------------------------------------|--------------------|-------------------------|--------|-------------|--------|------|
| Anatomical region                    | Sphericity Assumed | 36025.330               | 9      | 4002.814    | 19.403 | .000 |
|                                      | Greenhouse-Geisser | 36025.330               | 2.001  | 18007.668   | 19.403 | .000 |
|                                      | Huynh-Feldt        | 36025.330               | 2.334  | 15434.465   | 19.403 | .000 |
|                                      | Lower-bound        | 36025.330               | 1.000  | 36025.330   | 19.403 | .000 |
| Anatomical region * Anesthetic agent | Sphericity Assumed | 429.771                 | 9      | 47.752      | .231   | .990 |
|                                      | Greenhouse-Geisser | 429.771                 | 2.001  | 214.826     | .231   | .794 |
|                                      | Huynh-Feldt        | 429.771                 | 2.334  | 184.128     | .231   | .827 |
|                                      | Lower-bound        | 429.771                 | 1.000  | 429.771     | .231   | .636 |
| Error(region)                        | Sphericity Assumed | 37134.276               | 180    | 206.302     |        |      |
|                                      | Greenhouse-Geisser | 37134.276               | 40.011 | 928.099     |        |      |
|                                      | Huynh-Feldt        | 37134.276               | 46.682 | 795.479     |        |      |
|                                      | Lower-bound        | 37134.276               | 20.000 | 1856.714    |        |      |

905

**Tests of Between-Subjects Effects**

Measure: Anesthetic agent

| Source           | Type III Sum of Squares | df | Mean Square | F        | Sig. |
|------------------|-------------------------|----|-------------|----------|------|
| Intercept        | 21272.744               | 1  | 21272.744   | 1.006E12 | .000 |
| Anesthetic agent | 1.291E-8                | 1  | 1.291E-8    | .611     | .444 |
| Error            | 4.230E-7                | 20 | 2.115E-8    |          |      |

906

907

**Pairwise Comparisons**

| (I) Urethane | (J) Isoflurane | Mean Difference (I-J) | Std. Error | Sig. <sup>a</sup> | 95% Confidence Interval for Difference <sup>a</sup> |             |
|--------------|----------------|-----------------------|------------|-------------------|-----------------------------------------------------|-------------|
|              |                |                       |            |                   | Lower Bound                                         | Upper Bound |
| Urethane     | Isoflurane     | -1.558E-5             | .000       | .444              | -5.718E-5                                           | 2.602E-5    |
| Isoflurane   | Urethane       | 1.558E-5              | .000       | .444              | -2.602E-5                                           | 5.718E-5    |

Based on estimated marginal means

a. Adjustment for multiple comparisons: Bonferroni.

908  
909

910 **Supplementary Table 9.**

911

**Effects of anatomical region and region\*data type on connectivity patterns – urethane**

| Source                                               |                    | Type III Sum of Squares | df     | Mean Square | F      | Sig. |
|------------------------------------------------------|--------------------|-------------------------|--------|-------------|--------|------|
| Anatomical region                                    | Sphericity Assumed | 4049.246                | 9      | 449.916     | 10.571 | .000 |
|                                                      | Greenhouse-Geisser | 4049.246                | 3.226  | 1255.053    | 10.571 | .000 |
|                                                      | Huynh-Feldt        | 4049.246                | 3.942  | 1027.262    | 10.571 | .000 |
|                                                      | Lower-bound        | 4049.246                | 1.000  | 4049.246    | 10.571 | .003 |
| Anatomical region * data type<br>(real or synthetic) | Sphericity Assumed | 6193.021                | 9      | 688.113     | 16.168 | .000 |
|                                                      | Greenhouse-Geisser | 6193.021                | 3.226  | 1919.511    | 16.168 | .000 |
|                                                      | Huynh-Feldt        | 6193.021                | 3.942  | 1571.122    | 16.168 | .000 |
|                                                      | Lower-bound        | 6193.021                | 1.000  | 6193.021    | 16.168 | .000 |
| Error(Region)                                        | Sphericity Assumed | 9193.034                | 216    | 42.560      |        |      |
|                                                      | Greenhouse-Geisser | 9193.034                | 77.432 | 118.723     |        |      |
|                                                      | Huynh-Feldt        | 9193.034                | 94.603 | 97.175      |        |      |
|                                                      | Lower-bound        | 9193.034                | 24.000 | 383.043     |        |      |

912

913

914 **Supplementary Table 10.**

915

| Effects of anatomical region and region*data type on connectivity patterns – isoflurane |                    |                         |        |             |        |      |
|-----------------------------------------------------------------------------------------|--------------------|-------------------------|--------|-------------|--------|------|
| Source                                                                                  |                    | Type III Sum of Squares | df     | Mean Square | F      | Sig. |
| Anatomical region                                                                       | Sphericity Assumed | 2499.975                | 9      | 277.775     | 7.251  | .000 |
|                                                                                         | Greenhouse-Geisser | 2499.975                | 2.520  | 992.123     | 7.251  | .001 |
|                                                                                         | Huynh-Feldt        | 2499.975                | 3.216  | 777.273     | 7.251  | .000 |
|                                                                                         | Lower-bound        | 2499.975                | 1.000  | 2499.975    | 7.251  | .016 |
| Anatomical region * data type<br>(real or synthetic)                                    | Sphericity Assumed | 3985.935                | 9      | 442.882     | 11.561 | .000 |
|                                                                                         | Greenhouse-Geisser | 3985.935                | 2.520  | 1581.831    | 11.561 | .000 |
|                                                                                         | Huynh-Feldt        | 3985.935                | 3.216  | 1239.277    | 11.561 | .000 |
|                                                                                         | Lower-bound        | 3985.935                | 1.000  | 3985.935    | 11.561 | .004 |
| Error(Region)                                                                           | Sphericity Assumed | 5516.596                | 144    | 38.310      |        |      |
|                                                                                         | Greenhouse-Geisser | 5516.596                | 40.317 | 136.830     |        |      |
|                                                                                         | Huynh-Feldt        | 5516.596                | 51.461 | 107.199     |        |      |
|                                                                                         | Lower-bound        | 5516.596                | 16.000 | 344.787     |        |      |

916

917

918

919

920

921

922

923

924

925

926

927

928

929

930

931

932

933

934

935
